1           **Evaluating the performance of malaria genomics for inferring changes in transmission**  
2                                                   **intensity using transmission modelling**

3

4 Oliver J. Watson <sup>1\*</sup>, Lucy C. Okell <sup>1</sup>, Joel Hellewell <sup>1</sup>, Hannah C. Slater <sup>1</sup>, H. Juliette T. Unwin <sup>1</sup>, Irene  
5 Omedo <sup>2</sup>, Philip Bejon <sup>2</sup>, Robert W. Snow <sup>3,4</sup>, Abdisalan M. Noor <sup>5</sup>, Kirk Rockett <sup>6</sup>, Christina Hubbard <sup>6</sup>,  
6 Joaniter I. Nankabirwa <sup>7,8</sup>, Bryan Greenhouse <sup>9</sup>, Hsiao-Han Chang <sup>10</sup>, Azra C. Ghani <sup>1</sup>, Robert Verity <sup>1</sup>

7           1. MRC Centre for Global Infectious Disease Analysis, Department of Infectious Disease Epidemiology,  
8           Imperial College London, UK

9           2. KEMRI-Wellcome Trust Research Programme, Centre for Geographic Medicine Research-Coast, Kilifi,  
10           Kenya

11           3. Population Health Unit, Kenya Medical Research Institute - Wellcome Trust Research Programme, P.O.  
12           Box 43640-00100, Nairobi, Kenya

13           4. Centre for Tropical Medicine and Global Health, Nuffield Department of Clinical Medicine, University of  
14           Oxford, Oxford, UK

15           5. Global Malaria Programme, World Health Organization

16           6. Wellcome Centre for Human Genetics, University of Oxford, Oxford, UK

17           7. Infectious Diseases Research Collaboration, Kampala, Uganda

18           8. Makerere University College of Health Sciences

19           9. Department of Medicine, University of California, San Francisco, San Francisco, USA

20           10. Center for Communicable Disease Dynamics, Harvard TH Chan School of Public Health, Boston, USA

21 **Abstract**

22 Advances in genetic sequencing and accompanying methodological approaches have resulted in  
23 pathogen genetics being used in the control of infectious diseases. To utilise these methodologies for  
24 malaria we first need to extend the methods to capture the complex interactions between parasites,  
25 human and vector hosts, and environment. Here we develop an individual-based transmission model  
26 to simulate malaria parasite genetics parameterised using estimated relationships between  
27 complexity of infection and age from 5 regions in Uganda and Kenya. We predict that cotransmission  
28 and superinfection contribute equally to within-host parasite genetic diversity at 11.5% PCR  
29 prevalence, above which superinfections dominate. Finally, we characterise the predictive power of  
30 six metrics of parasite genetics for detecting changes in transmission intensity, before grouping them  
31 in an ensemble statistical model. The best performing model successfully predicted malaria  
32 prevalence with mean absolute error of 0.055, suggesting genetic tools could be used for monitoring  
33 the impact of malaria interventions.

34

35 Molecular tools are increasingly being used to understand the transmission histories and phylogenies  
36 of infectious pathogens <sup>1</sup>. Using phylodynamic methods it is now possible to estimate the historic  
37 prevalence of infection directly from molecular data, even in organisms with relatively complex  
38 lifecycles <sup>2</sup>. However, these tools typically rely on pathogens having an elevated mutation rate and not  
39 undergoing sexual recombination, which allows for the application of coalescent theory <sup>3</sup>.  
40 Consequently, these techniques are yet to be adapted for the study of *P. falciparum* malaria, which is  
41 known to undergo frequent sexual recombination. In addition, malaria transmission between both the  
42 human and the mosquito hosts involves a series of population bottlenecks <sup>4,5</sup>, which combined with  
43 the brief sexual stage involving a single two-step meiotic division <sup>6</sup>, have marked effects on the  
44 population genetics of *P. falciparum* <sup>7,8</sup>. This is extenuated by evidence of cotransmission of multiple  
45 clonally related parasites <sup>9</sup>, which combined with host mediated immune <sup>10,11</sup> and density-dependent  
46 regulation of superinfection <sup>12,13</sup> result in a complicated network of processes driving the genetic  
47 diversity of the parasite population within an individual host.

48 Despite this substantial complexity, an increasingly nuanced understanding of the processes shaping  
49 parasite genetic diversity is appearing, with multiple genetic metrics proving promising for inferring  
50 transmission intensity <sup>14,15</sup>. For example, measures of the multiplicity of *P. falciparum* infections have  
51 been shown to be useful for identifying hotspots of malaria transmission <sup>16,17</sup>. The spatial connectivity  
52 of parasite populations has also been shown to be well predicted by pairwise measures of identity-by-  
53 descent <sup>18,19</sup>. More recently, it has been shown that malaria genotyping could be used to enhance  
54 epidemiological surveillance <sup>20</sup>, however, two main challenges have been identified before molecular  
55 tools could be used in an operational context. The first is that our understanding of the relationship  
56 between transmission intensity and within-host parasite genetic diversity is incomplete. Combined  
57 models of both population genetics and malaria epidemiology would allow us to develop a more  
58 detailed view of both processes, yet these two approaches are largely explored separately. Recent  
59 efforts have been made to incorporate both modelling scales within one framework <sup>21</sup>, with the  
60 concomitant modelling of resistance evolution both within and between hosts yielding important  
61 insights into the evolution of drug resistance <sup>22</sup>. However, the realism of either the transmission  
62 process or the genetic evolutionary process has been limited in these models, with the representation  
63 of recombination and the parasite lifecycle within the mosquito often simplified. This makes the  
64 generalisability of using molecular tools for surveillance difficult. More realistic models are  
65 subsequently needed that capture both processes. These models could answer previous  
66 hypotheses<sup>23,24</sup> about how transmission intensity alters the rate at which superinfection events and  
67 cotransmission of genetically related parasites shape the parasite genetic diversity observed within  
68 humans. The second challenge is to understand in what situations molecular tools will offer

69 advantages over traditional surveillance. In addition, power calculations need to be carried out to  
70 understand how many samples are required for reliable inference and what types of genomic data are  
71 most informative.

72 Here we use mathematical transmission modelling to address these challenges. We extend a  
73 previously published malaria transmission model <sup>25</sup>, which now allows parasite populations to be  
74 followed explicitly through the parasite's obligate sexual life cycle by the inclusion of individually  
75 modelled mosquitoes. The new model is fitted to parasite single nucleotide polymorphism (SNP)  
76 genotype data to capture the observed relationship between an individual's age and their complexity  
77 of infection (COI), defined as the total number of genetically distinct parasite strains in an individual.  
78 Using the fitted model, we characterise how six measures of parasite genetic diversity respond to  
79 changes in transmission intensity. We continue by conducting a power analysis, assessing the ability  
80 of each metric to detect changes in transmission intensity as a function of the number of available  
81 samples. We conclude by building an ensemble statistical model, which demonstrates how routinely  
82 collected clinical genotype samples could be used for accurate prediction of malaria prevalence using  
83 as few as 200 SNP genotyped samples.

## 84 **Results**

### 85 **Complexity of Infection Data**

86 First, we used *THE REAL McCOIL* <sup>26</sup> to estimate the COI from SNP genotyped samples collected  
87 previously from individuals with evidence of asexual parasitemia by microscopy from regions in Kenya  
88 and Uganda. (Figure 1) These two datasets were selected as they recorded both the age of the sampled  
89 individuals and SNP intensities at sufficiently large number of loci, enabling the relationship between  
90 COI and age to be estimated. After excluding SNP loci with more than 20% missing data and  
91 subsequently removing samples with more than 25% missing SNP data from further analysis, the COI  
92 was estimated for 2419 samples from 95 primary schools in Western Kenya (1363 from Nyanza  
93 province and 1056 from Western province) and 584 samples from representative cross-sectional  
94 household surveys in three sub-counties in Uganda (462 from Nagongera in Tororo District, 74 from  
95 Kihhihi in Kanungu District, and 48 Walukuba in Jinja District). Distribution of COI varied between each  
96 region, ranging between 1 – 21 and broadly peaking in children aged six years old before decreasing  
97 with increasing age of the individual sampled.

### 98 **Fitted Model**

99 We developed an extended version of a previously published individual-based model of malaria  
100 transmission <sup>25</sup>. Briefly, the model was extended to include individual mosquitoes, enabling parasite  
101 populations and their genotypes to be tracked throughout the full lifecycle, enabling the potential  
102 formation of multiple oocysts from an infectious event and multiple genetically distinct sporozoites to  
103 be onwardly transmitted. Male and female gametocytes are sampled from the infecting human with  
104 the probability proportional to relative densities of each genotype. The resultant oocyst is able to  
105 produce up to four new parasite genotypes resulting from a two-step meiotic division. The extensions  
106 require use to define the proportion of sporozoites from an infectious bite that survive to found a  
107 blood stage infection, which we define as  $\zeta$ . This process will ultimately affect the level of new parasite  
108 genetic diversity introduced and consequently we parameterised our developed model (see Materials  
109 and Methods and Supplementary methods) through fitting to the earlier estimated relationships  
110 between COI and age in the five regions across Uganda and Kenya (Figure 1a). We estimate that 20%  
111 of sporozoites onwardly transmitted within an infectious bite successfully progress to a blood-stage  
112 infection and produce gametocytes that may contribute to future mosquito infections. The model  
113 captures the observed peak in COI observed at age 7-8 (Figure 1a); however, the comparatively fewer  
114 samples at higher ages make it difficult to confirm that this is the true peak in COI. Additionally, this  
115 observed peak in COI also likely reflects the limits of detection, with more accurate model predictions  
116 occurring under the assumption that parasite strains that would not be detected by PCR do not

117 contribute to the estimated COI (Figure 1b). Model fitting also showed that sensitivity of the model fit  
 118 to the percentage of sporozoites that survive is negligible between values of 15-20%, with the  
 119 confidence intervals for the most likely parameter value of  $\zeta$  overlapping intervals for values of  $\zeta$   
 120 ranging from 0.1 to 0.29.

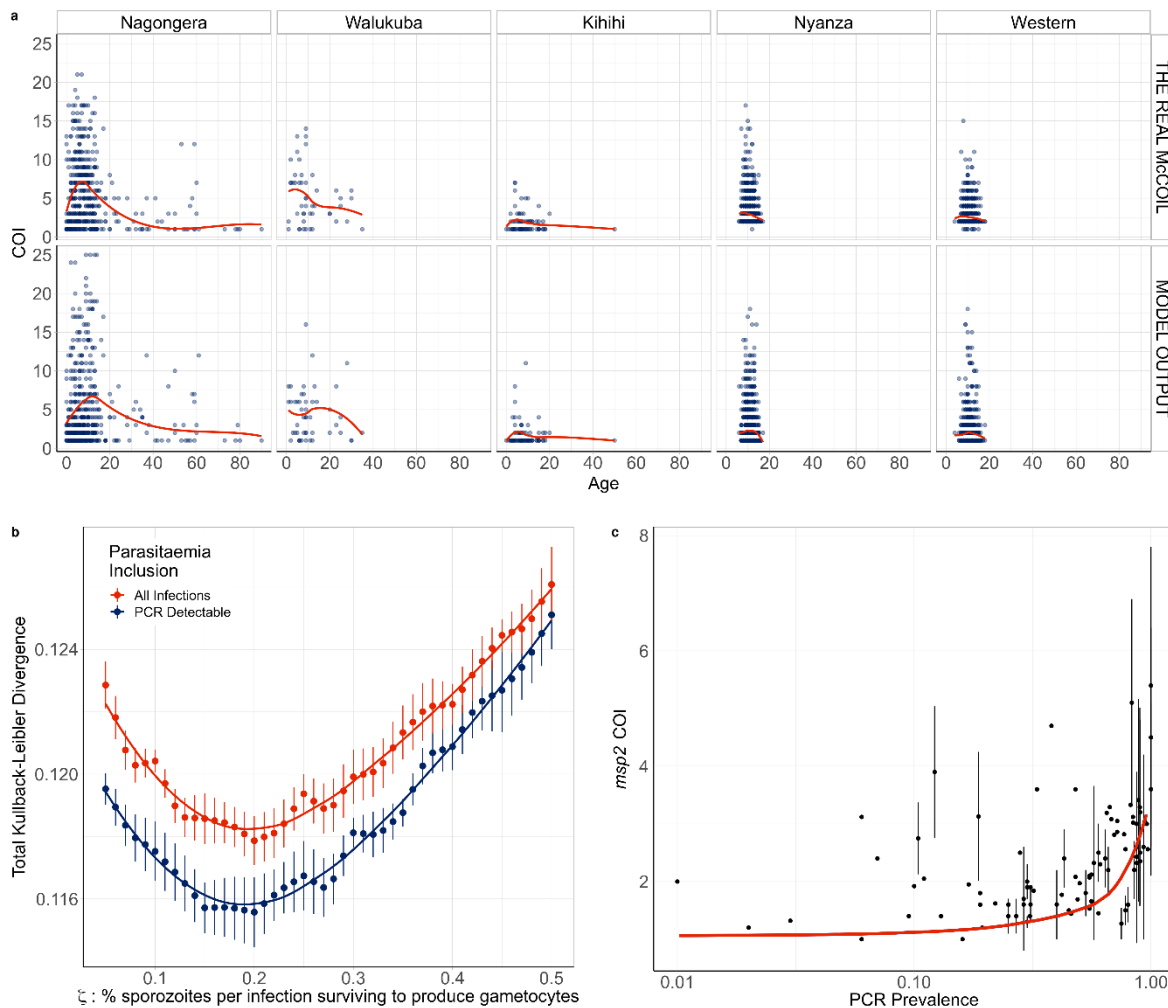

**Figure 1: Modelled estimates of the relationship between complexity of infection against age. a)** One realisation of the model predicted relationship between complexity of infection (COI) and age compared to the observed relationship estimated using *THE REAL McCOIL*. Each point represents an individual, with a local regression fit plotted in red. The relationship shown represents the selected best model fit, which estimates that 20% of sporozoites successfully progress to blood-stage infection in an individual with no immunity. In **b)** the results of the model fit are shown, with each point representing the mean Kullback-Leibler divergence and the whiskers representing the 95% confidence interval. Results of model fitting are shown for the assumption that all infections are detected (red) or only those that are PCR-detectable (blue). In **c)** the model predicted relationship between COI measured by *msp2* genotyping and PCR prevalence is shown in red, with the point-ranges showing observed values of COI by *msp2* genotyping from the literature review.

121

122 To further assess the fitted model, we wanted to incorporate estimates of COI based on *msp2*  
 123 genotyping, which is more commonly measured, however, it does underestimate COI in individuals

124 with high COI, with COIs > 7 difficult to resolve. We updated a previous literature review<sup>16</sup> of paired  
125 estimates of *m*sp2 COI and parasite prevalence by PCR, which yielded 91 paired measures of *m*sp2 COI  
126 and PCR prevalence. The fitted model predicts an increase in *m*sp2 COI with increasing malaria  
127 prevalence in agreement with the data collected within our literature search (Figure 1c). However,  
128 there are notably larger uncertainties in the recorded *m*sp2 COI at higher prevalence ranges in the  
129 studies found.

### 130 **Contribution of cotransmission events to within-host parasite diversity**

131 Using the fitted model, we explored the relationship between the proportion of within-host parasite  
132 strains that are highly-related, which we define as being more than 50% IBD with other parasites and  
133 thus indicative of cotransmission events, and transmission intensity. The model-predicted proportion  
134 of within-host parasite diversity that is due to cotransmission events was shown to increase at lower  
135 transmission intensities (Figure 2a). We predict that at PCR prevalence less than 11.5%, more than  
136 50% of strains within polygenomically infected individuals of all ages result from cotransmission  
137 events, rather than superinfection. This is based on the assumption that highly related parasites have  
138 originated from a recent common ancestor, and as such reflects the proportion of within-host genetic  
139 diversity that is due to cotransmission events rather than superinfection. We also predict this  
140 relationship is dependent on the age of individuals sampled, with parasites within younger individuals  
141 more likely to be more highly related. This reflects the increased chance that younger individuals will  
142 be treated after an initial infection due to their lower acquired immunity increasing the probability of  
143 developing clinical symptoms from an infection. Subsequently, younger individuals will be less able to  
144 accrue parasites from superinfection events, which increases the likelihood that any polyclonal  
145 individuals are the result of a cotransmission event. In Figure 2b, the model-predicted relationship  
146 between mean IBD in mixed infections and the fraction of mixed infections is shown, and is well  
147 described by an exponential trend line fit to this data. The model-predicted relationship is comparable  
148 to estimates of IBD from whole genome sequence data collected from sites across Africa and Asia as  
149 part of the Pf3k study<sup>27</sup>. However, the model predicts significantly lower mean IBD in settings with a  
150 high fraction of mixed infections compared to the estimates based on the whole genome sequencing  
151 data, with samples from sites in Ghana, Malawi, Mali and the Democratic Republic of the Congo  
152 exhibiting higher mean IBD than predicted by the model.

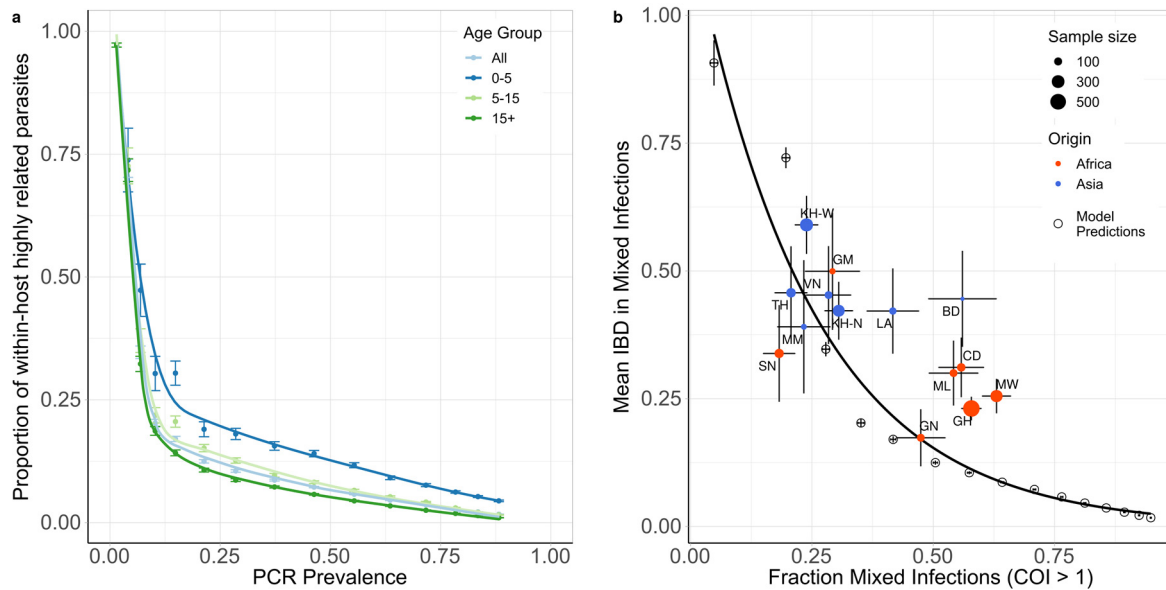

**Figure 2: Contribution of superinfection and cotransmission to within host parasite relatedness.** In **a**) the model predicted relationship between the mean within host proportion of highly identical parasite strains (>50% of loci comparisons are identical by descent (IBD)) against PCR prevalence. The relationship is shown for all ages and for three age groups: 0-5 years, 5-15 years and 15+ years, with error bars showing  $\pm 1$  standard error of the mean. In **b**) the mean IBD in mixed infections (COI > 1) is shown against the proportion of mixed infections. Results from model simulations are shown with empty circles with an exponential regression shown with the black curve. The model estimates are compared to estimates of IBD from whole genome sequence data collected in sites across Africa and Asia, which were estimated previously in Zhu et al <sup>27</sup>. Populations are coloured by continent, with size reflecting sample size and error bars showing  $\pm 1$  standard error of the mean. Abbreviations: SN-Senegal, GM-The Gambia, NG-Nigeria, GN-Guinea, CD-The Democratic Republic of Congo, ML-Mali, GH-Ghana, MW-Malawi, MM-Myanmar, TH-Thailand, VN-Vietnam, KH-Cambodia, LA-Laos, BD-Bangladesh.

153

#### 154 The impact of intervention strategies on parasite genetic diversity

155 Using our parameterised model, we first modelled how a reduction in transmission would affect four  
 156 genetic metrics as the prevalence of malaria declined due to the scale up of interventions (Figure 3).  
 157 The genetic metrics explored were: 1) the population mean complexity of infection (COI), 2) the % of  
 158 samples that are polygenomic (COI > 1), 3) the % of unique parasite 24-SNP barcodes and 4) the  
 159 coefficient of uniqueness (COU) (Figure 3). COU is a new measure of genetic relatedness within  
 160 samples and is equal to 0 when all barcodes within a sample are identical, and is equal to 1 when all  
 161 barcodes within a sample are unique (a multi-locus analogue of homozygosity).

162 The model was initiated at 70% PCR prevalence with no interventions in place. Three levels of  
 163 intervention scale-up were simulated, representing a low, medium and high reduction in prevalence  
 164 resulting in a final PCR prevalence of ~45%, ~20% and ~5% respectively after ten years. We predict



165 that all four metrics decline proportionally with declining malaria prevalence (Figure 3a). The model  
166 predicts that the specific relationship depends on the population chosen for genetic testing  
167 (Supplementary Figure 1a). For example, COI is predicted to be higher in older age categories. The  
168 percentage of unique samples varied greatly depending on the on the sub-population sampled,  
169 reflecting difference in the absolute numbers of individuals that fall within each sub-population.  
170 Samples taken from individuals with asymptomatic infections were predicted to have the highest COI  
171 and percentage of polygenomic samples. Across the scenarios simulated, metrics based on the  
172 complexity of infection (COI and % Polygenomic) showed a higher level of correlation with changes in  
173 the prevalence of malaria than measures based on the uniqueness of samples (COU and % Unique)  
174 (Table 1). In addition, samples collected only from patients with symptomatic malaria led to metrics  
175 that were the least correlated with reductions in prevalence, resulting from the decreased number of  
176 available samples. This effect was most noticeable when assessing the percentage of unique  
177 genotypes within clinical samples, which had a correlation coefficient of 0.24 with PCR prevalence  
178 (Table 1).

179 We also assessed measures of parasite genetic diversity based on comparisons of the number of loci  
180 that are identical-by-descent (IBD), which included the within-host pairwise mean proportion of loci  
181 that are IBD (iIBD) and the population pairwise mean proportion of loci that are IBD (pIBD). We predict  
182 that both metrics increase in response to declines in prevalence, however, we predict that pIBD only  
183 increases substantially at PCR prevalences less than 15% (Figure 3b). Consequently, metrics based on  
184 IBD were explored at a lower starting prevalence of 35% PCR prevalence before the scale up of  
185 interventions. The shape of the increase in iIBD was predicted to be dependent on the population  
186 sampled (Supplementary Figure 1a), with iIBD increasing quicker in symptomatic individuals. iIBD,  
187 however, becomes less informative as transmission intensity declines, with individuals less likely to be  
188 infected with multiple strains due to the lower rates of superinfection.

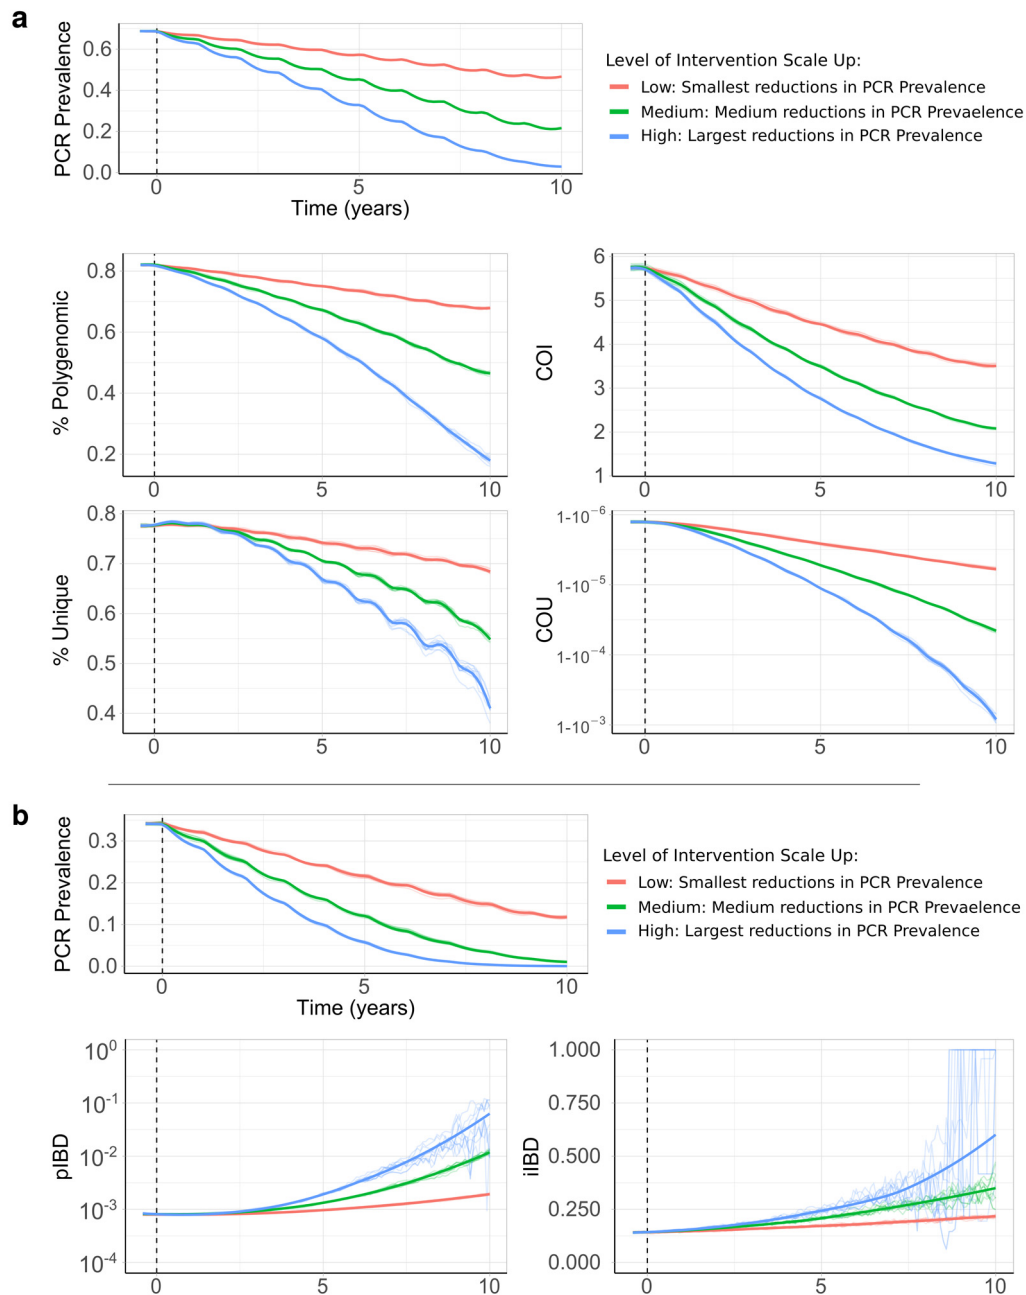

**Figure 3: Impact of changes in transmission intensity upon genetic metrics of transmission intensity.** In **a**) the top plot shows the change in PCR prevalence after the introduction of 3 different levels of intervention scale up, with both the 10 individual stochastic realisations and the mean local regression smoothed relationship shown. The following four plots show the population mean percentage of the population that are polygenomically infected, the complexity of infection (COI), the percentage of samples that are genotypically unique (% unique) and the coefficient of uniqueness (COU) for the prevalence declines seen in the first row. In **b**) the top plot shows the change in PCR prevalence, which starts at a lower starting prevalence of 35% compared to 70% in **a**). The following row shows the within-host identity-by-descent (iIBD) mean across the 24 identity loci considered, and the population mean pairwise measure of IBD (pIBD). In all plots the vertical dashed black line shows the time from which the scale up of interventions starts (Time = 0 years).

**Table 1: Kendall rank correlation coefficients between genetic diversity metrics and parasite prevalence.** Coefficients are bound between -1 and 1, with 1 indicating perfect ranked positive correlation and -1 indicating perfect ranked negative correlation.

| Sampled      | % Polygenomic | COI  | % Unique | COU  | iIBD  | pIBD  |
|--------------|---------------|------|----------|------|-------|-------|
| All          | 0.97          | 0.96 | 0.83     | 0.93 | -0.89 | -0.86 |
| 0-5          | 0.96          | 0.96 | 0.73     | 0.93 | -0.80 | -0.86 |
| 5-15         | 0.97          | 0.96 | 0.83     | 0.93 | -0.86 | -0.86 |
| 15+          | 0.97          | 0.96 | 0.83     | 0.92 | -0.84 | -0.86 |
| Clinical     | 0.87          | 0.91 | 0.24     | 0.75 | -0.64 | -0.85 |
| Asymptomatic | 0.97          | 0.96 | 0.83     | 0.93 | -0.89 | -0.86 |

## 190 Power Analysis

191 To evaluate the performance of each metric for detecting annual changes in the prevalence of malaria,  
192 we calculated the statistical power for each metric at different sample sizes, focussing on samples  
193 collected from children aged between 5-15 years old. We estimate that after 5 years of intervention  
194 scale up, corresponding to an absolute decrease in malaria prevalence by PCR of 20%, no more than  
195 350 samples are required for each metric explored (except for iIBD) to detect the change in  
196 transmission intensity 80% of the time (Figure 4). The predictive power, however, declined across all  
197 metrics when the effect size, i.e. the decrease in prevalence, decreased. With 600 samples, each  
198 metric had less than 40% power to detect the decrease in prevalence after 1 year. The performance  
199 of each metric was additionally dependent on the starting prevalence, with metrics based on the  
200 uniqueness of samples (COU and % Unique) predicted to be more powerful at lower starting  
201 prevalences compared to higher prevalences (Figure 4b). Metrics based on measures of IBD were  
202 overall less powerful, with the predictive power of iIBD being less than 80% across all years and sample  
203 sizes (Figure 4c). pIBD only exhibited a predictive power greater than 80% when detecting the largest  
204 change in prevalence between 22.5% and 8%, requiring over 225 samples.

205 The power of COU, % Unique and pIBD were noticeably worse when it was assumed that samples from  
206 polygenomically infected individuals could not be phased (Supplementary Figure 2). Under this  
207 assumption we assume that we are unable to observe the genotype of each strain and consequently  
208 only the major haplotype within an individual is available, i.e. calling the most abundant allele at each  
209 locus of the barcode, which negates our ability to measure an individual's iIBD. Across the full range  
210 of malaria prevalence simulated, measures of COI and COU were consistently predicted to be the most  
211 powerful, with % unique samples and IBD metrics demonstrating increased power to detect changes

212 in transmission in areas with lower baseline transmission intensities where we predict the genetic  
 213 variation to be lower.

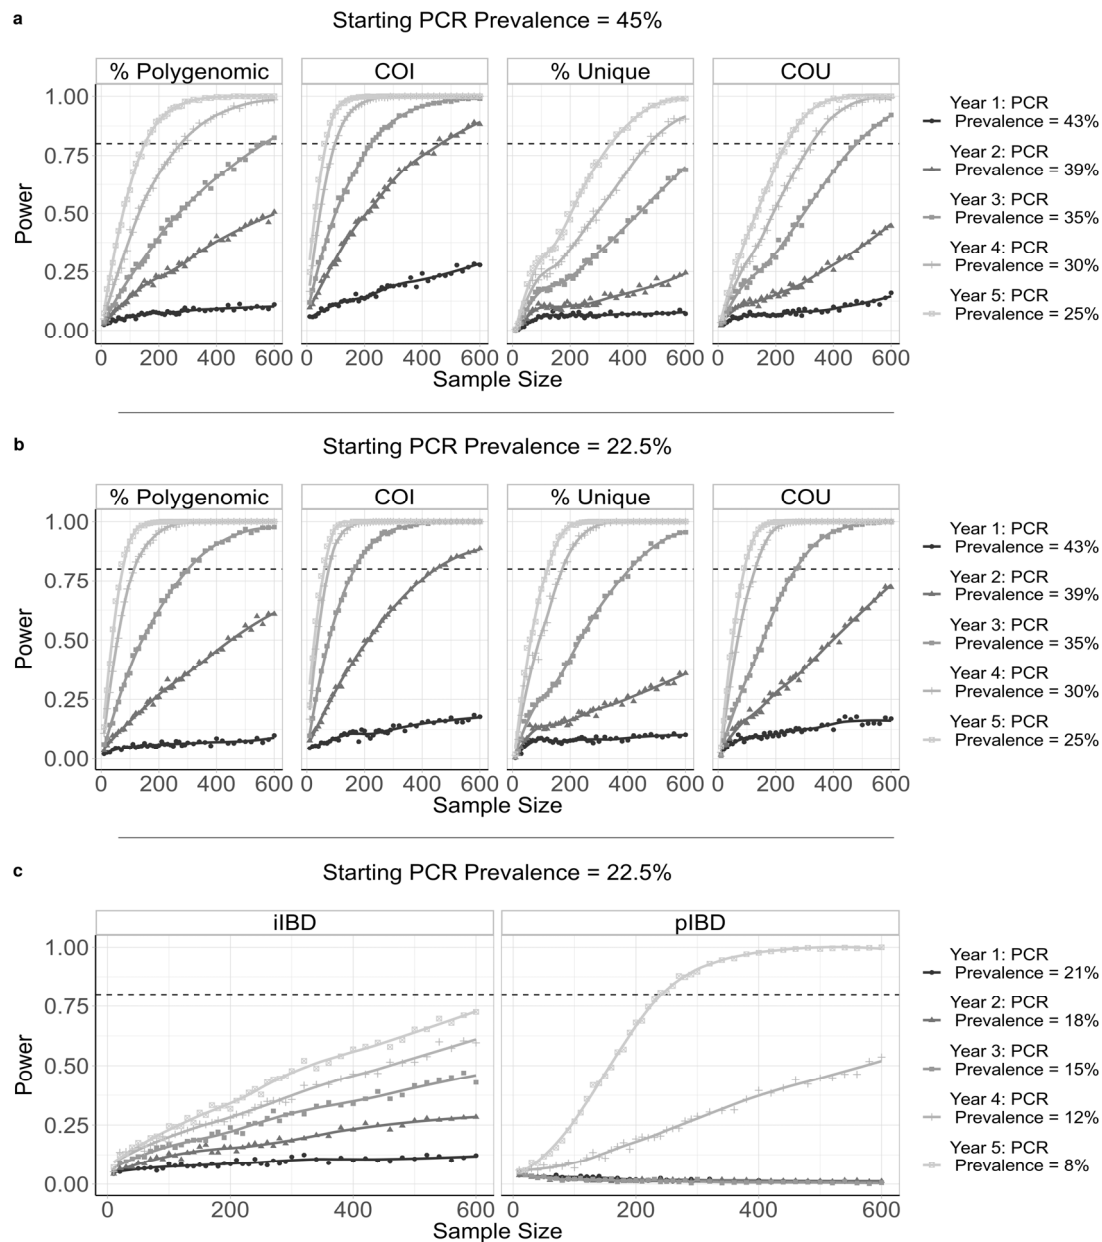

**Figure 4: Predictive power of six metrics of parasite genetic diversity with respect to sample size.** The distribution of sample means of six metrics of parasite genetic diversity were compared for five years following the initiation of the scale up of intervention coverage. For each sample size, the power is defined as the proportion of 100 subsamples comparing year 0 and years 1-5 for which a significant difference in the mean was observed, estimated using one-tailed Monte Carlo p-values generated by 100 permutations of the years samples were collected in. In **a**) the metrics assessed are the percentage of samples that are polygenomic, the complexity of infection (COI), the percentage of barcodes within samples that are unique, and the coefficient of uniqueness (COU). The power of each metric was compared across five years in which a 20% absolute decrease in parasite prevalence from 45% was observed. The same information is shown in **b**), but for a 14.5% absolute decrease in prevalence from 22.5% over 5 years. In **c**) the metrics considered are the mean within-host identity-by-descent (iIBD) and the population mean pairwise measure of IBD (pIBD). In each plot 80% power is shown with the horizontal dashed line.

## 215 Statistical model for predicting transmission intensity

216 In order to translate the information we have characterised into an effective tool for assisting  
217 surveillance programs, a statistical model was created to predict malaria prevalence using genomic  
218 metrics derived from parasite SNP genotyping (see Materials and Methods). Due to the difficulty in  
219 phasing high complexity infections, we assumed that all collected samples were unphased and as such  
220 we did not focus on metrics based on IBD when building our data set for training our statistical model.

221 The fitted ensemble model performed well on out-of-sample simulation datasets, and was able to  
222 identify the underlying model behaviour used to generate the training dataset (Figure 5a). The best  
223 performing model provided accurate predictions of malaria prevalence when tested on SNP genotype  
224 data from the five administrative regions, with an observed mean absolute error equal to 0.055 for  
225 these five locations. The performance of the model was enhanced when sample metadata was  
226 available (Figure 5b), with the ensemble model trained and tested using data with no age or clinical  
227 status information consistently performing worse. Similar patterns were also observed when assessing  
228 the performance of each of the level 1 models in the ensemble model (Supplementary Table 1). As in  
229 the power analysis, across the range of malaria transmission intensities assessed, measures of COI and  
230 COU were observed to be the most informative metrics (Supplementary Figure 3). Model predictors  
231 based on the age and clinical status of individuals sampled contributed 28% towards the total model  
232 importance.

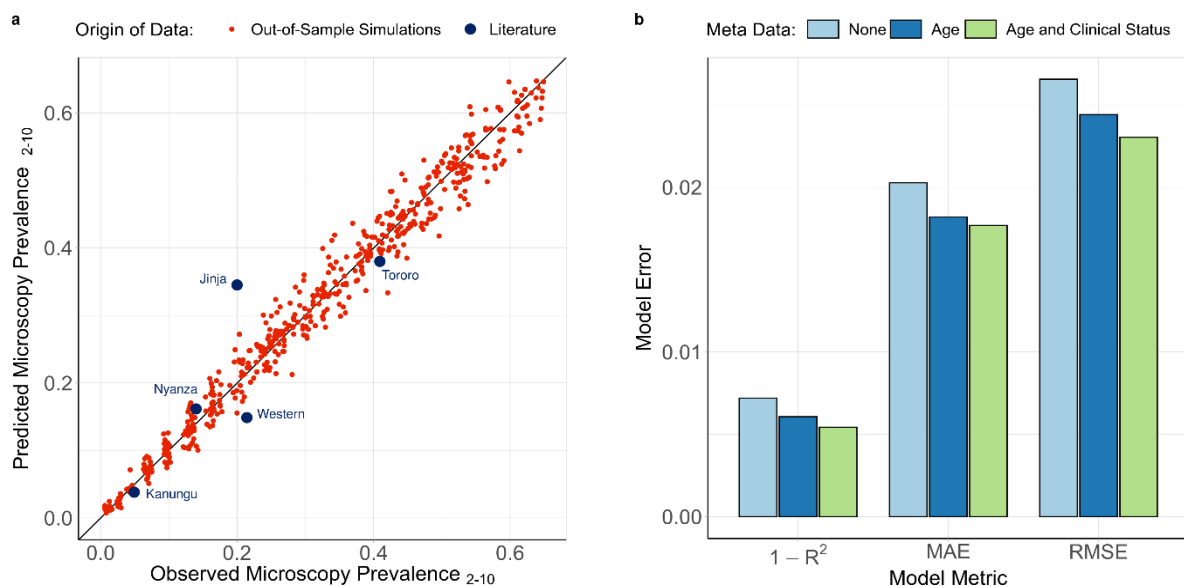

**Figure 5: Ensemble statistical model predicted malaria prevalence vs observed malaria prevalence.** In **a**) the performance of the trained ensemble statistical model is shown, with the model predicted prevalence in red showing the predictions for the out-of-sample test dataset composed of model simulations held back from model fitting. The blue points show the predicted prevalence for the 5 administrative regions considered earlier. In **b**), the performance of the ensemble model is shown under different assumptions about the availability of patient metadata within simulated data.

## 234 **Discussion**

235 The substantial reduction in the cost of generating genomic datasets over the last ten years and the  
236 establishment of scientific networks committed to generating and sharing genomic data has resulted  
237 in an abundance of sequenced *Plasmodium falciparum* genomes. This effort has resulted in the  
238 identification of loci associated with emerging drug resistance mechanisms<sup>28</sup> and assisted in  
239 developing putative novel drug targets <sup>29</sup>. Another potential use of malaria sequencing efforts is  
240 understanding how malaria genomes can be used to study transmission. Simple population genetics  
241 principles predict that in a closed population a reduction in transmission intensity will typically be  
242 accompanied by a reduction in parasite genetic diversity, resulting from reduced opportunities for  
243 outcrossing to occur within the sexual stages of the parasite's life cycle. However, there is as yet no  
244 consensus in the use of parasite genetics for inferring transmission intensity. There is a need to  
245 understand the contribution of superinfection and cotransmission towards the within-host parasite  
246 genetic diversity, which is often highlighted within critiques of early attempts to utilise modelling  
247 approaches for transmission intensity inference <sup>30</sup>.

248 In this study we have extended a previously developed model of malaria transmission to include  
249 individual mosquitoes and discrete parasite populations. The percentage of sporozoites that are  
250 successful within an infectious bite was estimated to be 20% (95% CI 10%-29%), and was estimated  
251 by fitting our model to 3002 measures of the complexity of infection and age of individuals in 5 sites  
252 across Kenya and Uganda. The fitted model was used to initially estimate the proportion of the within-  
253 host parasite genetic diversity that is the result of cotransmission events resulting in the acquisition  
254 of highly identical parasite strains, as opposed to strains acquired through superinfection events. We  
255 predict that for malaria prevalence greater than 11.5%, the majority of genetic variation within-hosts  
256 is generated through superinfection events. To our knowledge this is the first attempt to characterise  
257 this relationship across the full transmission intensity spectrum seen within sub-Saharan Africa and  
258 represents a move towards standardising which genomic metrics should be used at different  
259 transmission ranges.

260 We predict that IBD within samples decays exponentially as the proportion of samples is increasingly  
261 polygenomic. This exponential relationship was similar to findings in a recent study of IBD, which used  
262 whole genome sequence data to explore this relationship <sup>27</sup>. However, the model predicted  
263 significantly lower IBD at higher transmission settings (settings with a higher fraction of mixed  
264 infections) than observed in the data presented in Zhu et al. There are a number of reasons for this.  
265 Firstly, the whole genome sequence data was collected from individuals of unknown age as part of a  
266 convenience sample. If the samples were collected exclusively from younger individuals, the results in

267 Figure 2a would suggest that the mean IBD would be higher than if the samples were collected across  
268 all ages. Secondly, in the study by Zhu et al, the estimated COI across all sites was less than 2, which is  
269 significantly lower than COI estimates from the sites in Kenya and Uganda in Figure 3.3. Given that  
270 some of the African study sites in Zhu et al are in areas of high transmission intensity, it seems likely  
271 that the convenience sampling scheme used has selected for individuals with lower COIs. One  
272 explanation could be that the individuals chosen for sequencing receive treatment more regularly,  
273 which reduces the probability of parasite strains from superinfection events being present at the time  
274 of sampling. This could be due to their age, or due to their enrolment in the study that resulted in  
275 them being selected for sequencing. Ultimately, without this information it is challenging to draw  
276 strong conclusions about the validity of the model predictions in Figure 3.2b, although the broad  
277 similarity is encouraging.

278 Our newly defined measure of parasite diversity, the coefficient of uniqueness (COU), alongside COI  
279 were consistently powerful statistical tools for detecting changes in malaria prevalence. This is hardly  
280 surprising, as we should consider that the % unique samples and the % of polygenomic samples are  
281 simply the extreme cases of these metrics, and so we would expect them to contain less information.  
282 Additionally, the power analysis conducted was under the assumption that all samples that could be  
283 detected by PCR can be effectively phased. This is an overly ambitious assumption, and it is more  
284 correct to assess these metrics under the assumption that polygenomic samples cannot be phased  
285 (Supplementary Figure 2). However, the increase in statistical power when we are able to phase  
286 samples should highlight a need within the research field for methods to compare unphased parasite  
287 samples, with the majority of samples at higher transmission intensities predicted to have a COI  
288 greater than 1.

289 In the absence of being able to phase polyclonal samples, however, the observed genomic metrics  
290 were still informative within the ensemble statistical model developed to translate parasite genetic  
291 information into estimates of malaria prevalence. For example, variable importance was observed for  
292 each predictor variable (Supplementary Figure 3), however, COU and COI accounted for nearly half  
293 the variance explained. There is also a degree of compensation afforded between metrics, i.e. where  
294 one metric becomes less informative, another metric becomes more predictive. For example, at PCR  
295 PfPR less than 10%, COI and the % of samples that are polygenomic will become substantially less  
296 informative, whereas IBD measures will start being more informative. This is further demonstrated by  
297 only needing 200 samples within our statistical ensemble model to produce accurate predictions of  
298 the prevalence of malaria, with the addition of individual level metadata yielding further gains in  
299 model performance (Figure 4b). As more samples are added only modest improvements in model  
300 predictive performance are observed (Supplementary Figure 4). The importance of meta data,



301 specifically the age of individuals, is highlighted in the findings of the model predicted COI between  
302 age groups. In Figure 3, we compared the COI between asymptomatic and symptomatic individuals,  
303 in which we predicted across all ages that asymptomatic individuals have higher COI. However, this  
304 finding does not hold when we compare the COI between symptomatic and asymptomatic individuals  
305 at different age groups and across different transmission intensities. For example, in the model fitting  
306 in lower transmission areas younger children who are symptomatic are predicted to have higher COI  
307 than asymptomatic younger children (Supplementary Figure 5). This finding is reversed, however, at  
308 higher transmission intensities reflecting the interaction between acquired clinical immunity and rates  
309 of superinfection.

310 This study has some important limitations. Firstly, we assumed there is only one parameter detailing  
311 the percentage of sporozoites that successfully progress to a blood-stage, which is the same for all  
312 study sites considered. This is likely a simplification, but our observation of 20% sporozoites surviving  
313 from an individual mosquito feed is comparable to Bejon et al's observation of 25% (14 sporozoites  
314 surviving from an assumed total of 55 sporozoites resulting from five mosquito bites) of sporozoites  
315 successfully progressing to blood-stage infection<sup>31</sup>. It is, however, higher than estimates based on  
316 transmission efficacy studies<sup>32</sup>. The model fitting, however, revealed that the sensitivity to this  
317 parameter was low, with the confidence intervals for a value of  $\zeta$  equal to 0.20 overlapping intervals  
318 for values of  $\zeta$  ranging from 0.1 to 0.29. This is highlighted when we re-examined the model predicted  
319 relationship between *m**sp*2 COI and prevalence with these values, which showed only slight changes  
320 to the predicted COI (Supplementary Figure 6). The fitted estimate was also based on model fits to the  
321 administrative mean prevalence as opposed to the recorded prevalence in the specific study sites. For  
322 example, the study site in Jinja District, Walukuba, was observed to have the lowest parasite  
323 prevalence of all three study sites in Uganda<sup>33</sup>. If we had used this prevalence value as opposed to  
324 the administrative prevalence value, the parameterised model would have failed to predict the  
325 pattern of COI in Walukuba (Supplementary Figure 7), which may suggest that this study site exhibits  
326 higher heterogeneity in the force of infection. However, the fact that the model-predicted COI closely  
327 matches the observed data when using the administrative region's prevalence may suggest that  
328 parasite genetic metrics are more representative of the prevalence at larger spatial scales, which in  
329 turn may reflect human mobility between areas of differing transmission intensity and parasite  
330 genetic diversity. This may also be of benefit from a surveillance point of view, with 200 samples being  
331 able to give accurate measures of malaria prevalence within a large area. This could be of particular  
332 utility in areas where community surveillance is not feasible, in which samples collected from  
333 symptomatic patients attending public health facilities could provide additional information in helping  
334 to translate clinical incidence into measures of parasite prevalence.



335 Secondly, we did not explicitly model the scale-up of vector based interventions, instead incorporating  
336 the effects of insecticide treated nets and indoor residual spraying through their impact on the  
337 average age of the mosquito population and the rate of anthrophagy. This assumption will cause each  
338 individual to experience the same relative reduction in molecular force of infection, i.e. the number  
339 of new *P. falciparum* clones acquired over time. Consequently, model predictions are likely to  
340 underestimate the variance in the reduction of within-host parasite genetic diversity resulting from  
341 vector based interventions. This effect would lead to a decrease in the statistical power of the genetic  
342 metrics considered and subsequently the sample sizes presented within the power analysis are likely  
343 on the lower end of the sample sizes required for a given predictive power.

344 Thirdly, while the developed statistical model provided accurate estimates of malaria prevalence  
345 overall for the five regions, the prediction for Jinja was noticeably worse, which reflects the high COI  
346 observed in that region given its comparatively low prevalence. While we were able to replicate the  
347 COI age relationship for this region during model parameterisation, this was largely due to the fact  
348 that the historic prevalence for the region was much higher. For this reason, the model predicts that  
349 individuals in the region will have higher acquired immunity and will subsequently be able to harbour  
350 more infections before developing a fever and potentially being treated and thus clearing infections.  
351 The developed statistical model, however, did not include any covariates for historic prevalence or  
352 genetic diversity. Subsequently, predictions made by this model largely reflect the mean diversity  
353 expected for a given prevalence and will suffer when making predictions for regions that have  
354 experienced a recent and large decline in prevalence. Recent declines in prevalence will cause  
355 individuals in the region to possess higher immunity than predicted based solely on the region's  
356 current prevalence, which has been shown to manifest in clear patterns in the size of the  
357 submicroscopic reservoir<sup>34</sup>. From a genetic perspective, increased immunity may either lead to a  
358 reduction in within-host genetic diversity due to more infections being suppressed. Alternatively,  
359 increased immunity may increase within-host genetic diversity if the higher immunity decreases the  
360 frequency with which people develop clinical symptoms, which in turn reduces the likelihood that an  
361 individual has recently been treated and subsequently has cleared all parasite strains. The latter may  
362 be a possible explanation for the comparatively high COI observed in the Walukuba study site in  
363 Uganda compared to its malaria prevalence. Consequently, as more genetic data is collected over time  
364 we will be able to extend the methods presented here to better handle recent changes in prevalence  
365 and incorporate historic measures of genetic diversity for more accurate predictions of malaria  
366 prevalence. Alternatively, the modelling framework presented here could be extended to incorporate  
367 alternative data sources, such as longitudinal measures of clinical incidence from passive surveillance.

368 In our model we have only considered neutral genetic markers that are unlinked. While these loci are  
369 informative for capturing standing genetic diversity, we have not considered how selective events may  
370 shape the genetic diversity. For example, if drug resistance were to spread quickly through an area it  
371 is likely that this would cause a decrease in genetic diversity in neighbouring regions<sup>35</sup>. However, the  
372 precise impact that this will have on the metrics explored in this study will depend on both how quickly  
373 recombination will result in linkage disequilibrium decay and the strength of the selective sweep.  
374 Although these were not assessed in this paper, it would be possible to adapt our model to consider  
375 loci under selection and simulate how known factors that affect the speed of selection, such as  
376 transmission intensity, importation of resistance, treatment rates and the metabolic costs associated  
377 with resistance, impact genetic metrics. Lastly, the model could also be extended to better capture  
378 importation and spatial dynamics. The current model employs a continent-island assumption, where  
379 the genotypes of imported parasites are drawn from a population with a fixed population-level allele  
380 frequency. This could be extended to consider populations within a metapopulation, where  
381 importations are sampled from connected populations. This would have the benefit of better  
382 capturing dynamics between different populations and could incorporate different data sources such  
383 as mobile phone records and travel surveys, which have been used to give a greater resolution to the  
384 spatial dynamics of malaria transmission<sup>36,37</sup>.

385 The 2018 world malaria report shows that the reductions in the global burden of malaria made since  
386 2000 may be stalling, with 2 million more cases of malaria estimated in 2017 compared to 2016<sup>38</sup>.  
387 These declines have necessitated the development of new tools to enhance current surveillance  
388 efforts. In this study, we have shown that that malaria genetic metrics could provide an additional  
389 toolkit for operational surveillance. In particular, a combination of metrics focussed on the complexity  
390 of infections, the frequency and uniqueness of genotyped barcodes and measures of identity-by-  
391 descent could be used for inferring the prevalence of malaria across the current range of malaria  
392 prevalence. It is important to highlight that there is still a need to understand the cost-effectiveness  
393 of these tools compared to current surveillance methods. In many endemic areas, clinical incidence  
394 data provides a temporally and spatially rich measure of malaria transmission. However, it is reliant  
395 on the accuracy of estimates of the population size. In situations where this is not possible, such as  
396 migratory populations and clinics with unknown health facility catchment areas. Consequently, there  
397 may be a niche for parasite genetics to complement measures of malaria incidence in as well as in  
398 areas in which the spatial coverage of surveillance data is poor. It is hoped that these findings, in  
399 particular the importance of sample metadata and quantifying the contribution of cotransmission and  
400 superinfection events have in shaping genetic diversity, can guide future efforts by the wider  
401 community for utilising malaria genotyping for epidemiological surveillance.

## 402 **Methods**

### 403 ***P. falciparum* transmission model**

404 An individual-level stochastic model was developed to simulate the transmission dynamics of  
405 *Plasmodium falciparum*. The model is based upon previous modelling efforts<sup>25,39–41</sup>, however with  
406 extensions to now include individual mosquitoes as well as humans, and with parasites now modelled  
407 as discrete populations associated with individual infection events. Each parasite population is  
408 identified by a 24-SNP barcode, with sexual stages represented by two barcodes to characterise the  
409 female and male gametes within the vector and allow recombination to be explicitly modelled. An  
410 overview of the original model is given here before describing the changes made to the model, with  
411 the full methods detailed in the Supplementary Methods.

412 People exist in one of six infection states, with individuals beginning life susceptible to infection. At  
413 birth, individuals possess a level of maternal immunity that decays exponentially over the first 6  
414 months. Each day individuals experience a force of infection that depends on their level of immunity,  
415 biting rate and the abundance of infectious mosquitoes. Infected individuals, after a 12-day latent  
416 period, develop either clinical disease or asymptomatic infection dependent on their level of acquired  
417 immunity from previous infections. Individuals that develop disease have a fixed probability of being  
418 effectively treated. Treated individuals enter a protective state of prophylaxis, before returning to  
419 susceptible. Individuals that did not receive treatment recover to a state of asymptomatic infection.  
420 Asymptomatic individuals progress to a subpatent infection, before clearing infection and returning  
421 to susceptible. All infected individuals that are not in the prophylactic state are also susceptible to  
422 superinfection.

423 The adult stage of mosquito development is modelled individually, with adult mosquitoes beginning  
424 life susceptible to infection. Mosquitoes seek a blood meal on the same day they are born and every  
425 3 days after that until they die. Infected mosquitoes pass through a latent infection stage that lasts 10  
426 days before becoming onwardly infectious to humans. The introduction of vector based interventions  
427 leads to a decrease in the average age of the mosquito population throughout the duration of the  
428 intervention due to the increased mortality rate. A decrease in anthropagy is also observed reflecting  
429 mosquitoes that are repelled as a result of interventions but do not die. The daily rate of change to  
430 these parameters in response to insecticide treated nets (ITN) and indoor residual spraying (IRS) is  
431 calculated using an equivalent deterministic version of the earlier model that included interventions  
432<sup>25</sup>, before being introduced as a time-dependent variable within the stochastic model.

433

#### 434 **Parasite genetics**

435 Parasites are modelled as discrete populations that result from an infection event associated with a  
436 mosquito or a human (Supplementary Methods for full description). Each asexual parasite is  
437 characterised by one genetic barcode, which contains information relating to 24-SNPs distributed  
438 across the parasite genome. In simulations modelling identity-by-descent (IBD), the barcode is  
439 modified to contain 24 integer values that uniquely index an individual in the starting population,  
440 enabling ancestry to be tracked over time and hence IBD rather than identity-by-state (IBS) to be  
441 modelled. Sexual stages of the parasite lifecycle within the mosquito are represented by both a female  
442 and male barcode, thus defining the range of recombinants that could be produced. During a  
443 successful human to mosquito infection event, multiple oocysts may develop within the mosquito.  
444 The number of oocysts formed is drawn from a zero-truncated negative binomial distribution with  
445 mean equal to 2.5 and shape equal to 1 (95% quantile: 1-9)<sup>42-44</sup>, with required gametocytes sampled  
446 from the human according to the relative parasitemias of the gametocytogenic strains. During a  
447 successful mosquito to human transmission event, multiple sporozoites may be onwardly transmitted,  
448 with the genotypes the result of recombination events from ruptured oocysts. Recombination is  
449 simulated at this stage, and generated recombinants stored within the mosquito and associated with  
450 the oocyst from which it originated. The number of sporozoites passed on is drawn from a zero  
451 truncated geometric distribution with a mean of 10 (95% quantile: 1-29)<sup>31,45</sup>, with the percentage of  
452 sporozoites that survive estimated within model fitting.

#### 453 **Model Fitting**

454 Our extensions to the transmission model introduced a new parameter,  $\zeta$ , which determines the  
455 percentage of the total sporozoites passed on within a feeding event that survive to yield a blood-  
456 stage infection and subsequently produce gametocytes. To fit this parameter we compared the model-  
457 predicted relationship between the complexity of infection (COI) and age utilising previously SNP  
458 genotyped samples from five sites across Kenya<sup>46</sup> and Uganda<sup>26</sup>, collected between 2008-2010 and  
459 2012-2013 respectively. In brief, dried blood spots were collected, and samples taken from individuals  
460 with evidence of asexual parasitemia by microscopy were selected for Sequenom SNP genotyping.  
461 Genotyping was conducted using the Sequenom MassARRAY iPLEX platform, yielding minor and major  
462 allele frequencies.

463 We applied *THE REAL McCOIL* proportional method to the SNP genotyped samples to estimate each  
464 individual's COI<sup>26</sup>. Samples were filtered first by excluding loci with more than 20% missing samples,  
465 followed by samples with more than 25% missing loci. We performed thirty MCMC repetitions for  
466 each sample, with a burn-in period of  $10^4$  iterations followed by  $10^6$  sampling iterations, with

467 genotyping measurement error estimated along with COI and allele frequencies, and a maximum  
468 observable COI equal to 25. Default priors were assigned for each parameter, and we used standard  
469 methodology to confirm convergence between chains <sup>47</sup>.

470 The observed relationship between COI and age was compared to the model-predicted relationship  
471 for each administrative region studied. The model-predicted relationship was generated by  
472 conducting simulations calibrated to estimates of the administrative malaria prevalence from 2000 to  
473 2015 <sup>48</sup>, exploring 50 values of  $\zeta$  between 0.5% - 50%. For each region, 10 stochastic realisations of  
474 100,000 individuals were simulated with a burn-in period of 50 years to ensure both an  
475 epidemiological and genetic equilibrium was reached by year 2000. For each of the five administrative  
476 regions of interest, we incorporate the historical scale up of insecticide treated nets and indoor  
477 residual spraying between 2000 and 2015, using data previously collated for the World Malaria Report  
478 <sup>49</sup>, and estimates for the coverage of treatment modelled using DHS and MICS survey data <sup>50</sup>.  
479 Seasonality for each region was included by altering the total number of mosquitoes using annually  
480 fluctuating seasonal curves fitted to daily rainfall data from 2002 to 2009 <sup>51</sup>. Lastly, we introduced  
481 rates of importation of infections that were calculated for each year between 2000 and 2015 using a  
482 fitted gravity model of human mobility <sup>52</sup>. These sources represent infections acquired from individuals  
483 travelling out of the region and returning with an infection, and also mosquitoes being infected by  
484 individuals travelling from outside into to the region of interest.

485 We calculated the “distance” between our model predictions and the observed data using the  
486 Kullback-Leibler (KL) divergence <sup>53</sup>. Using an individual’s age and estimated COI, the distance between  
487 the observed and predicted distributions of COI for each age is given by:

$$488 \quad I(\zeta_i) := I(pCOI_i(\xi), oCOI_i) = \sum_{COI=1}^{25} pCOI_i(\xi) \ln \left( \frac{pCOI_i(\xi)}{oCOI_i} \right)$$

489 where  $oCOI_i$  is the observed distribution of COI at age  $i$  and  $pCOI_i(\zeta)$  is one realisation of the model-  
490 predicted distribution of COI at age  $i$  for a given frequency of successful sporozoites  $\zeta$  (with only  
491 parasites that would have been detected by PCR being assumed to be detected by SNP genotyping).  
492 The total distance for a given value of  $\zeta$  is subsequently given by:

$$493 \quad \sum_r^5 \left( \frac{\sum_i^{n_i} I(\zeta_i) w_i}{\sum_i^{n_i} w_i} \right)_r$$

494 where  $w_i$  is the weight for age  $i$ , and  $n_i$  is the total number of unique sampled ages in administrative  
495 region  $r$ . This can be interpreted as the sum of the weighted KL divergence means within a region,

496 with weights equal to the number of observations at each age. Each region thus contributes equally  
497 to the total distance, despite the difference in the number of individuals in each region.

498 Further model fit validation was conducted by incorporating a comparatively larger collection of  
499 estimates of the COI estimated using *msp2* genotyping, which is more commonly referred to as  
500 multiplicity of infection (MOI). *msp2* genotyping is known to underestimate COI in  
501 individuals with very high COIs, with COIs > 7 difficult to observe. Consequently, to distinguish these  
502 estimates we refer to these as *msp2* COI. We compiled *P. falciparum* malaria MOI data where there  
503 were estimates of both the malaria prevalence and the MOI of study participants. This was conducted  
504 by updating a previous review<sup>16</sup>, using the same search terms of “falciparum multiplicity infection  
505 prevalence *msp2*”. Analogous relationships were predicted using the fitted model, with the model  
506 predicted *msp2* COI estimated by assuming that any individual with a model predicted COI greater  
507 than 7 results in an *msp2* COI of 7, which reflects the limits of resolution when using *msp2* genotyping  
508<sup>54</sup>.

#### 509 **Contribution of superinfection and cotransmission events towards within-host genetic diversity**

510 The parameterised model was used to characterise the relative contribution of cotransmission events  
511 and superinfection events towards within-host parasite genetic diversity. Ten stochastic realisations  
512 of 100,000 individuals were simulated for 50 years at 15 different transmission intensities. The  
513 proportion of highly identical parasite strains (>50% of loci are IBD in pairwise comparison) within  
514 simulations was recorded and used to estimate the proportion of within-host genetic diversity that is  
515 due to cotransmission events rather than superinfection.

#### 516 **Impact of changes in transmission intensity upon measures of parasite genetic diversity**

517 The effect of declines in transmission intensity on four measures of within-host genetic diversity was  
518 explored. The four measures considered were: 1) the mean COI, 2) the percentage of polygenomic  
519 infections (% Polygenomic), 3) the percentage of unique barcode genotypes (% Unique), and 4) a  
520 newly defined metric, the coefficient of uniqueness (COU), which is given by:

$$521 \quad COU = 1 - \frac{(\sum_i^n x_i^2) - \frac{1}{n}}{(1 - \frac{1}{n})}; 0 \leq COU \leq 1$$

522 where  $x_i$  is the frequency at which barcode  $i$  occurs within a sample of size  $n$ .  $COU = 0$  when all  
523 barcodes within a sample are identical, and  $COU = 1$  when all barcodes within a sample are unique.

524 Ten stochastic realisations of 100,000 individuals were simulated for 50 years with an initial parasite  
525 prevalence measured by PCR equal to ~70% and a fixed importation rate to ensure both a genetic and  
526 epidemiological equilibrium. Once at equilibrium, three differing levels of intervention scale-up (low,

527 medium, high) were introduced that lead to an absolute reduction in parasite prevalence from 70% to  
528 45%, 20% and 5% after 10 years. The scale-up of interventions resulted in an increase in the coverage  
529 of ITNs (maximum after 10 years: 30%, 60%, and 90%), IRS (maximum after 10 years: 20%, 40% and  
530 60%) and treatment (maximum after 10 years: 15%, 30%, 45%). For all simulations, the monthly mean  
531 for each genetic marker was recorded for the whole population as well as within three age ranges (0-  
532 5 years old, 5-15 years old and over 15 years old), and within individuals who were asymptomatic or  
533 symptomatic at the time of sample collection.

534 An identical analysis was conducted at a lower starting prevalence, with maximum reductions in  
535 parasite prevalence by PCR from 35% to 20%, 2% and ~0% after 10 years, in order to assess the change  
536 in two measures of identity-by-descent (IBD), pIBD and iIBD. The population mean IBD (pIBD) we  
537 define as the mean number of loci in pairwise comparisons between samples that are identical across  
538 all loci in terms of their 24-locus identity barcode (focusing on genotypes that could be detected by  
539 microscopy only), i.e. it is the mean proportion of shared ancestry between samples. The individual  
540 mean IBD (iIBD) is the mean number of identical loci of the 24-locus identity barcode within individuals  
541 who are polygenomically infected. If all sampled individuals are monogenomic, then iIBD is set equal  
542 to 1.

#### 543 **Statistical power analysis of parasite genetic measures**

544 To evaluate the utility of the considered measures of parasite genetic diversity, we conducted an  
545 analysis to characterise the predictive power of each metric for detecting changes in transmission  
546 intensity, and their sensitivities to the sample size chosen. In an analogous design to earlier  
547 simulations, we measured sample mean measures of the COI, % Polygenomic, % Unique, COU, iIBD  
548 and pIBD at yearly intervals for the first five years after the initiation of the ten-year scale-up of  
549 interventions.

550 Sensitivity to the sample size of each metric was assessed by sequentially sampling subsets of the data  
551 and comparing the mean difference in metrics. Sample sizes between 10 and 600 individuals were  
552 explored, with 100 samples drawn from a stochastic realisation at years 0, 1, 2, 3, 4 and 5, and  
553 comparisons made between years 1-5 and year 0, i.e. 0-1, 0-2, ... 0-5. All samples were collected from  
554 individuals aged between 5-15 years old. One-tailed Monte Carlo p-values were generated for each  
555 subsample by 100 permutations of the years that samples were collected from. The power of each  
556 metric was defined as the proportion of subsamples for which 95% of the permuted mean differences  
557 were greater or less than the observed mean difference, with the direction of the tail dependent on  
558 whether the metric is expected to decrease or increase respectively in response to a decrease in  
559 transmission intensity. The overall power for each metric was calculated as the mean power of ten



560 stochastic realisations, and repeated at two different starting parasite prevalence by PCR (~60% and  
561 ~30%). Metrics based on comparisons of IBD were only assessed for the lowest starting parasite  
562 prevalence. The performance of each metric was also explored under the assumption that it was not  
563 possible to phase all genotypes within the samples collected, and that only the dominant genotype  
564 was able to be called.

### 565 **Statistical modelling of the predictive performance of malaria genomics for surveillance**

566 A statistical model was constructed to predict malaria prevalence using the genomic metrics explored  
567 thus far, with three different assumptions about the availability of patient metadata (no metadata,  
568 patient age only, and both patient age and symptomatic status of infection). To assess the utility of  
569 such a model for surveillance, samples of 200 individuals were taken from a range of simulations that  
570 span the transmission, seasonality and intervention coverage range seen in sub-Saharan Africa. We  
571 used the sampled mean measures of the genomic metrics discussed, and where available summaries  
572 of the age and clinical status of samples to create our model simulated datasets. 25% of simulated  
573 datasets were held back for out-of-sample testing. Three different statistical models (gradient boosted  
574 trees, elastic net regression model and random forests) were fit to the model simulated data. The  
575 predictions of these level 1 models were subsequently used to train an ensemble model using a linear  
576 optimisation based on the root mean squared error (RMSE) of the level 1 models. When training both  
577 the level 1 models and the ensemble, K-fold cross validation sets were performed 25 times and  
578 subsequently averaged to reduce any bias from the cross validation set chosen. The averaged cross  
579 validation results were used to assess the performance of the ensemble model on the testing dataset  
580 by comparing the RMSE, mean absolute error (MAE) and the correlation under the different  
581 assumptions about the availability of patient metadata. The predictors of the ensemble model were  
582 assessed for their contribution to the overall model performance. Variable importance was calculated  
583 for each level 1 model, before reporting their overall importance as the weighted mean importance,  
584 with the weight equal to the level 1 model weights in the ensemble model. Lastly, the trained  
585 ensemble model was used to predict the prevalence of malaria for the study sites considered within  
586 Uganda and Kenya.



587 **References**

- 588 1. Hall, M., Woolhouse, M. & Rambaut, A. Epidemic Reconstruction in a Phylogenetics  
589 Framework: Transmission Trees as Partitions of the Node Set. *PLoS Comput. Biol.* **11**,  
590 e1004613 (2015).
- 591 2. Volz, E. M., Kosakovsky Pond, S. L., Ward, M. J., Leigh Brown, A. J. & Frost, S. D. W.  
592 Phylodynamics of Infectious Disease Epidemics. *Genetics* **183**, 1421–1430 (2009).
- 593 3. Grenfell, B. T. *et al.* Unifying the epidemiological and evolutionary dynamics of pathogens.  
594 *Science* **303**, 327–332 (2004).
- 595 4. Vaughan, J. A. Population dynamics of Plasmodium sporogony. *Trends Parasitol.* **23**, 63–70  
596 (2007).
- 597 5. Churcher, T. S. *et al.* Population biology of malaria within the mosquito: density-dependent  
598 processes and potential implications for transmission-blocking interventions. *Malar J* **9**, 311  
599 (2010).
- 600 6. Bennink, S., Kiesow, M. J. & Pradel, G. The development of malaria parasites in the mosquito  
601 midgut. *Cell. Microbiol.* **18**, 905–918 (2016).
- 602 7. McKenzie, F. E., Ferreira, M. U., Baird, J. K., Snounou, G. & Bossert, W. H. Meiotic  
603 recombination, cross-reactivity, and persistence in Plasmodium falciparum. *Evolution (N. Y.)*.  
604 **55**, 1299–1307 (2001).
- 605 8. Chang, H.-H. *et al.* Malaria life cycle intensifies both natural selection and random genetic  
606 drift. *Proc. Natl. Acad. Sci.* **110**, 20129–20134 (2013).
- 607 9. Wong, W. *et al.* Genetic relatedness analysis reveals the cotransmission of genetically related  
608 Plasmodium falciparum parasites in Thiès, Senegal. *Genome Med.* **9**, 5 (2017).
- 609 10. Barry, A. E. *et al.* Population genomics of the immune evasion (var) genes of Plasmodium  
610 falciparum. *PLoS Pathog.* **3**, 1–9 (2007).
- 611 11. Portugal, S. *et al.* Host-mediated regulation of superinfection in malaria. *Nat. Med.* **17**, 732–  
612 737 (2011).
- 613 12. Bruce, M. C. *et al.* Cross-Species Interactions Between Malaria Parasites in Humans. *Science*  
614 (80- ). **287**, 845–848 (2000).
- 615 13. Pinkevych, M. *et al.* Density-dependent blood stage Plasmodium falciparum suppresses  
616 malaria super-infection in a malaria holoendemic population. *Am. J. Trop. Med. Hyg.* **89**, 850–  
617 856 (2013).
- 618 14. Nkhoma, S. C. *et al.* Population genetic correlates of declining transmission in a human  
619 pathogen. *Mol. Ecol.* **22**, 273–285 (2013).
- 620 15. Daniels, R. *et al.* Genetic Surveillance Detects Both Clonal and Epidemic Transmission of  
621 Malaria following Enhanced Intervention in Senegal. *PLoS One* **8**, 4–10 (2013).
- 622 16. Karl, S. *et al.* Spatial effects on the multiplicity of Plasmodium falciparum infections. *PLoS One*  
623 **11**, 1–20 (2016).
- 624 17. Bejon, P. *et al.* Stable and Unstable Malaria Hotspots in Longitudinal Cohort Studies in Kenya.  
625 *PLoS Med.* **7**, e1000304 (2010).
- 626 18. Taylor, A. R. *et al.* Quantifying connectivity between local Plasmodium falciparum malaria  
627 parasite populations using identity by descent. *PLoS Genet.* 1–20 (2017).

- 628 doi:10.1371/journal.pgen.1007065
- 629 19. Omedo, I. *et al.* Micro-epidemiological structuring of Plasmodium falciparum parasite  
630 populations in regions with varying transmission intensities in Africa. *Wellcome Open Res.* **2**,  
631 10 (2017).
- 632 20. Daniels, R. F. *et al.* Modeling malaria genomics reveals transmission decline and rebound in  
633 Senegal. *Proc. Natl. Acad. Sci. U. S. A.* **112**, 7067–7072 (2015).
- 634 21. Nguyen, T. D. *et al.* Optimum population-level use of artemisinin combination therapies: A  
635 modelling study. *Lancet Glob. Heal.* **3**, e758–e766 (2015).
- 636 22. Legros, M. & Bonhoeffer, S. A combined within-host and between-hosts modelling  
637 framework for the evolution of resistance to antimalarial drugs. *J. R. Soc. Interface* **13**,  
638 20160148 (2016).
- 639 23. Nkhoma, S. C. *et al.* Resolving within-host malaria parasite diversity using single-cell  
640 sequencing. *bioRxiv* 391268 (2018). doi:10.1101/391268
- 641 24. Wong, W., Wenger, E. A., Hartl, D. L. & Wirth, D. F. Modeling the genetic relatedness of  
642 Plasmodium falciparum parasites following meiotic recombination and cotransmission. *PLOS*  
643 *Comput. Biol.* **14**, e1005923 (2018).
- 644 25. Griffin, J. T. *et al.* Potential for reduction of burden and local elimination of malaria by  
645 reducing Plasmodium falciparum malaria transmission: a mathematical modelling study.  
646 *Lancet Infect. Dis.* **3099**, 1–8 (2016).
- 647 26. Chang, H.-H. *et al.* THE REAL McCOIL: A method for the concurrent estimation of the  
648 complexity of infection and SNP allele frequency for malaria parasites. *PLOS Comput. Biol.* **13**,  
649 e1005348 (2017).
- 650 27. Zhu, S. J. *et al.* The origins and relatedness structure of mixed infections vary with local  
651 prevalence of P. falciparum malaria. *Elife* **8**, 1–41 (2019).
- 652 28. Cheeseman, I. H. *et al.* A Major Genome Region Underlying Artemisinin Resistance in Malaria.  
653 *Science (80-. )*. **336**, 79–82 (2012).
- 654 29. Ludin, P., Woodcroft, B., Ralph, S. A. & Mäser, P. In silico prediction of antimalarial drug  
655 target candidates. *Int. J. Parasitol. Drugs Drug Resist.* **2**, 191–199 (2012).
- 656 30. Greenhouse, B. & Smith, D. L. Malaria genotyping for epidemiologic surveillance. *Proc. Natl.*  
657 *Acad. Sci.* **112**, 6782–6783 (2015).
- 658 31. Bejon, P. *et al.* Calculation of Liver-to-Blood Inocula, Parasite Growth Rates, and  
659 Preerythrocytic Vaccine Efficacy, from Serial Quantitative Polymerase Chain Reaction Studies  
660 of Volunteers Challenged with Malaria Sporozoites. *J. Infect. Dis.* **191**, 619–626 (2005).
- 661 32. Smith, D. L., Drakeley, C. J., Chiyaka, C. & Hay, S. I. A quantitative analysis of transmission  
662 efficiency versus intensity for malaria. *Nat. Commun.* **1**, 108 (2010).
- 663 33. Nankabirwa, J. I. *et al.* Estimating malaria parasite prevalence from community surveys in  
664 Uganda: a comparison of microscopy, rapid diagnostic tests and polymerase chain reaction.  
665 *Malar. J.* **14**, 528 (2015).
- 666 34. Whittaker, C. *et al.* Variation in the Prevalence of Submicroscopic Malaria Infections:  
667 Historical Transmission Intensity and Age as Key Determinants. *bioRxiv* 554311 (2019).  
668 doi:10.1101/554311

- 669 35. Imwong, M. *et al.* The spread of artemisinin-resistant *Plasmodium falciparum* in the Greater  
670 Mekong Subregion: a molecular epidemiology observational study. *Lancet Infect. Dis.* **17**,  
671 491–497 (2017).
- 672 36. Tessema, S. *et al.* Using parasite genetic and human mobility data to infer local and cross-  
673 border malaria connectivity in Southern Africa. *Elife* **8**, 1–20 (2019).
- 674 37. Chang, H.-H. *et al.* Mapping imported malaria in Bangladesh using parasite genetic and  
675 human mobility data. *Elife* **8**, e43481 (2019).
- 676 38. World Health Organization. *World Malaria Report.* (2018).
- 677 39. Watson, O. J. *et al.* Modelling the drivers of the spread of *Plasmodium falciparum* hrp2 gene  
678 deletions in sub-Saharan Africa. *Elife* **6**, e25008 (2017).
- 679 40. Griffin, J. T., Ferguson, N. M. & Ghani, A. C. Estimates of the changing age-burden of  
680 *Plasmodium falciparum* malaria disease in sub-Saharan Africa. *Nat. Commun.* **5**, (2014).
- 681 41. Griffin, J. T. *et al.* Reducing *Plasmodium falciparum* Malaria Transmission in Africa: A Model-  
682 Based Evaluation of Intervention Strategies. *PLoS Med.* **7**, e1000324 (2010).
- 683 42. Churcher, T. S. *et al.* Predicting mosquito infection from *Plasmodium falciparum* gametocyte  
684 density and estimating the reservoir of infection. *Elife* **2013**, 1–12 (2013).
- 685 43. Stone, W. J. R. *et al.* The relevance and applicability of oocyst prevalence as a read-out for  
686 mosquito feeding assays. *Sci. Rep.* **3**, 3418 (2013).
- 687 44. Stone, W. J. R. *et al.* A scalable assessment of *Plasmodium falciparum* transmission in the  
688 standard membrane-feeding assay, using transgenic parasites expressing green fluorescent  
689 protein-luciferase. *J. Infect. Dis.* **210**, 1456–1463 (2014).
- 690 45. Beier, J. C. *et al.* Sporozoite transmission by *Anopheles freeborni* and *Anopheles gambiae*  
691 experimentally infected with *Plasmodium falciparum*. *J. Am. Mosq. Control Assoc.* **8**, 404–408  
692 (1992).
- 693 46. Omedo, I. *et al.* Geographic-genetic analysis of *Plasmodium falciparum* parasite populations  
694 from surveys of primary school children in Western Kenya. *Wellcome Open Res.* **2**, 1–25  
695 (2017).
- 696 47. Gelman, A. & Rubin, D. B. Markov chain Monte Carlo methods in biostatistics. *Stat. Methods*  
697 *Med. Res.* **5**, 339–355 (1996).
- 698 48. Bhatt, S. *et al.* The effect of malaria control on *Plasmodium falciparum* in Africa between  
699 2000 and 2015. *Nature* **526**, 207–11 (2015).
- 700 49. World Health Organization. *World Malaria Report 2015.* (2015). doi:ISBN 978 92 4 1564403
- 701 50. Cohen, J. M. *et al.* Optimizing Investments in Malaria Treatment and Diagnosis. *Science (80-*  
702 *)*. **338**, 612–4 (2012).
- 703 51. Cairns, M. *et al.* Estimating the potential public health impact of seasonal malaria  
704 chemoprevention in African children. *Nat. Commun.* **3**, 1–9 (2012).
- 705 52. Marshall, J. M. *et al.* Mathematical models of human mobility of relevance to malaria  
706 transmission in Africa. *Nat. Sci. Reports* 1–27 (2018). doi:10.1038/s41598-018-26023-1
- 707 53. Burnham, K. P., Anderson, D. R. & Burnham, K. P. *Model selection and multimodel inference :*  
708 *a practical information-theoretic approach.* (Springer-Verlag, 2002).

- 709 54. Gupta, V., Dorsey, G., Hubbard, A. E., Rosenthal, P. J. & Greenhouse, B. Gel versus capillary  
710 electrophoresis genotyping for categorizing treatment outcomes in two anti-malarial trials in  
711 Uganda. *Malar. J.* **9**, 1–8 (2010).  
712
- 713 2. Volz, E. M., Kosakovsky Pond, S. L., Ward, M. J., Leigh Brown, A. J. & Frost, S. D. W.  
714 Phylodynamics of Infectious Disease Epidemics. *Genetics* **183**, 1421–1430 (2009).
- 715 3. Grenfell, B. T. *et al.* Unifying the epidemiological and evolutionary dynamics of pathogens.  
716 *Science* **303**, 327–332 (2004).
- 717 4. Vaughan, J. A. Population dynamics of Plasmodium sporogony. *Trends Parasitol.* **23**, 63–70  
718 (2007).
- 719 5. Churcher, T. S. *et al.* Population biology of malaria within the mosquito: density-dependent  
720 processes and potential implications for transmission-blocking interventions. *Malar J* **9**, 311  
721 (2010).
- 722 6. Bennink, S., Kiesow, M. J. & Pradel, G. The development of malaria parasites in the mosquito  
723 midgut. *Cell. Microbiol.* **18**, 905–918 (2016).
- 724 7. McKenzie, F. E., Ferreira, M. U., Baird, J. K., Snounou, G. & Bossert, W. H. Meiotic  
725 recombination, cross-reactivity, and persistence in Plasmodium falciparum. *Evolution (N. Y.)*.  
726 **55**, 1299–1307 (2001).
- 727 8. Chang, H.-H. *et al.* Malaria life cycle intensifies both natural selection and random genetic  
728 drift. *Proc. Natl. Acad. Sci.* **110**, 20129–20134 (2013).
- 729 9. Wong, W. *et al.* Genetic relatedness analysis reveals the cotransmission of genetically related  
730 Plasmodium falciparum parasites in Thiès, Senegal. *Genome Med.* **9**, 5 (2017).
- 731 10. Barry, A. E. *et al.* Population genomics of the immune evasion (var) genes of Plasmodium  
732 falciparum. *PLoS Pathog.* **3**, 1–9 (2007).
- 733 11. Portugal, S. *et al.* Host-mediated regulation of superinfection in malaria. *Nat. Med.* **17**, 732–  
734 737 (2011).
- 735 12. Bruce, M. C. *et al.* Cross-Species Interactions Between Malaria Parasites in Humans. *Science*  
736 (80-. ). **287**, 845–848 (2000).
- 737 13. Pinkevych, M. *et al.* Density-dependent blood stage Plasmodium falciparum suppresses  
738 malaria super-infection in a malaria holoendemic population. *Am. J. Trop. Med. Hyg.* **89**, 850–  
739 856 (2013).
- 740 14. Nkhoma, S. C. *et al.* Population genetic correlates of declining transmission in a human  
741 pathogen. *Mol. Ecol.* **22**, 273–285 (2013).
- 742 15. Daniels, R. *et al.* Genetic Surveillance Detects Both Clonal and Epidemic Transmission of  
743 Malaria following Enhanced Intervention in Senegal. *PLoS One* **8**, 4–10 (2013).
- 744 16. Karl, S. *et al.* Spatial effects on the multiplicity of Plasmodium falciparum infections. *PLoS One*  
745 **11**, 1–20 (2016).
- 746 17. Bejon, P. *et al.* Stable and Unstable Malaria Hotspots in Longitudinal Cohort Studies in Kenya.  
747 *PLoS Med.* **7**, e1000304 (2010).
- 748 18. Taylor, A. R. *et al.* Quantifying connectivity between local Plasmodium falciparum malaria  
749 parasite populations using identity by descent. *PLoS Genet.* 1–20 (2017).

- 750 doi:10.1371/journal.pgen.1007065
- 751 19. Omedo, I. *et al.* Micro-epidemiological structuring of Plasmodium falciparum parasite  
752 populations in regions with varying transmission intensities in Africa. *Wellcome Open Res.* **2**,  
753 10 (2017).
- 754 20. Daniels, R. F. *et al.* Modeling malaria genomics reveals transmission decline and rebound in  
755 Senegal. *Proc. Natl. Acad. Sci. U. S. A.* **112**, 7067–7072 (2015).
- 756 21. Nguyen, T. D. *et al.* Optimum population-level use of artemisinin combination therapies: A  
757 modelling study. *Lancet Glob. Heal.* **3**, e758–e766 (2015).
- 758 22. Legros, M. & Bonhoeffer, S. A combined within-host and between-hosts modelling  
759 framework for the evolution of resistance to antimalarial drugs. *J. R. Soc. Interface* **13**, (2016).
- 760 23. Nkhoma, S. C. *et al.* Resolving within-host malaria parasite diversity using single-cell  
761 sequencing. *bioRxiv* 391268 (2018). doi:10.1101/391268
- 762 24. Wong, W., Wenger, E. A., Hartl, D. L. & Wirth, D. F. Modeling the genetic relatedness of  
763 Plasmodium falciparum parasites following meiotic recombination and cotransmission. *PLOS*  
764 *Comput. Biol.* **14**, e1005923 (2018).
- 765 25. Griffin, J. T. *et al.* Potential for reduction of burden and local elimination of malaria by  
766 reducing Plasmodium falciparum malaria transmission: a mathematical modelling study.  
767 *Lancet Infect. Dis.* **3099**, 1–8 (2016).
- 768 26. Chang, H.-H. *et al.* THE REAL McCOIL: A method for the concurrent estimation of the  
769 complexity of infection and SNP allele frequency for malaria parasites. *PLOS Comput. Biol.* **13**,  
770 e1005348 (2017).
- 771 27. Cheeseman, I. H. *et al.* A Major Genome Region Underlying Artemisinin Resistance in Malaria.  
772 *Science (80-. )*. **336**, 79–82 (2012).
- 773 28. Ludin, P., Woodcroft, B., Ralph, S. A. & Mäser, P. In silico prediction of antimalarial drug  
774 target candidates. *Int. J. Parasitol. Drugs Drug Resist.* **2**, 191–199 (2012).
- 775 29. Greenhouse, B. & Smith, D. L. Malaria genotyping for epidemiologic surveillance. *Proc. Natl.*  
776 *Acad. Sci.* **112**, 6782–6783 (2015).
- 777 30. Bejon, P. *et al.* Calculation of Liver-to-Blood Inocula, Parasite Growth Rates, and  
778 Preerythrocytic Vaccine Efficacy, from Serial Quantitative Polymerase Chain Reaction Studies  
779 of Volunteers Challenged with Malaria Sporozoites. *J. Infect. Dis.* **191**, 619–626 (2005).
- 780 31. Smith, D. L., Drakeley, C. J., Chiyaka, C. & Hay, S. I. A quantitative analysis of transmission  
781 efficiency versus intensity for malaria. *Nat. Commun.* **1**, 108 (2010).
- 782 32. Nankabirwa, J. I. *et al.* Estimating malaria parasite prevalence from community surveys in  
783 Uganda: a comparison of microscopy, rapid diagnostic tests and polymerase chain reaction.  
784 *Malar. J.* **14**, 528 (2015).
- 785 33. Imwong, M. *et al.* The spread of artemisinin-resistant Plasmodium falciparum in the Greater  
786 Mekong Subregion: a molecular epidemiology observational study. *Lancet Infect. Dis.* **17**,  
787 491–497 (2017).
- 788 34. World Health Organization (WHO). *World Malaria Report.* (2018).
- 789 35. Watson, O. J. *et al.* Modelling the drivers of the spread of Plasmodium falciparum hrp2 gene  
790 deletions in sub-Saharan Africa. *Elife* **6**, e25008 (2017).

- 791 36. Griffin, J. T., Ferguson, N. M. & Ghani, A. C. Estimates of the changing age-burden of  
792 Plasmodium falciparum malaria disease in sub-Saharan Africa. *Nat. Commun.* **5**, 3136 (2014).
- 793 37. Griffin, J. T. *et al.* Reducing Plasmodium falciparum malaria transmission in Africa: A model-  
794 based evaluation of intervention strategies. *PLoS Med.* **7**, (2010).
- 795 38. Churcher, T. S. *et al.* Predicting mosquito infection from Plasmodium falciparum gametocyte  
796 density and estimating the reservoir of infection. *Elife* **2013**, 1–12 (2013).
- 797 39. Stone, W. J. R. *et al.* The relevance and applicability of oocyst prevalence as a read-out for  
798 mosquito feeding assays. *Sci. Rep.* **3**, 3418 (2013).
- 799 40. Stone, W. J. R. *et al.* A scalable assessment of Plasmodium falciparum transmission in the  
800 standard membrane-feeding assay, using transgenic parasites expressing green fluorescent  
801 protein-luciferase. *J. Infect. Dis.* **210**, 1456–1463 (2014).
- 802 41. Beier, J. C. *et al.* Sporozoite transmission by Anopheles freeborni and Anopheles gambiae  
803 experimentally infected with Plasmodium falciparum. *J. Am. Mosq. Control Assoc.* **8**, 404–408  
804 (1992).
- 805 42. Omedo, I. *et al.* Geographic-genetic analysis of Plasmodium falciparum parasite populations  
806 from surveys of primary school children in Western Kenya. *Wellcome Open Res.* **2**, 1–25  
807 (2017).
- 808 43. Gelman, A. & Rubin, D. B. Markov chain Monte Carlo methods in biostatistics. *Stat. Methods*  
809 *Med. Res.* **5**, 339–355 (1996).
- 810 44. Bhatt, S. *et al.* The effect of malaria control on Plasmodium falciparum in Africa between  
811 2000 and 2015. *Nature* **526**, 207–11 (2015).
- 812 45. World Health Organization. *World Malaria Report 2015*. (2015). doi:ISBN 978 92 4 1564403
- 813 46. Cohen, J. M. *et al.* Optimizing Investments in Malaria Treatment and Diagnosis. *Science (80-.*  
814 *)*. **338**, 612–4 (2012).
- 815 47. Cairns, M. *et al.* Estimating the potential public health impact of seasonal malaria  
816 chemoprevention in African children. *Nat. Commun.* **3**, 1–9 (2012).
- 817 48. Marshall, J. M. *et al.* Mathematical models of human mobility of relevance to malaria  
818 transmission in Africa. *Nat. Sci. Reports* 1–27 (2018). doi:10.1038/s41598-018-26023-1
- 819 49. Burnham, K. P., Anderson, D. R. & Burnham, K. P. *Model selection and multimodel inference :*  
820 *a practical information-theoretic approach*. (Springer-Verlag, 2002).
- 821 50. Gupta, V., Dorsey, G., Hubbard, A. E., Rosenthal, P. J. & Greenhouse, B. Gel versus capillary  
822 electrophoresis genotyping for categorizing treatment outcomes in two anti-malarial trials in  
823 Uganda. *Malar. J.* **9**, 1–8 (2010).

824



825 **Acknowledgements**

826 OJW and JH acknowledge funding from Wellcome Trust PhD Studentships (109312/Z/15/Z and  
827 105272/Z/14/Z). HJTU, LCO and ACG acknowledge grant support from the Bill and Melinda Gates  
828 Foundation. LCO also acknowledges funding from a UK Royal Society Dorothy Hodgkin fellowship. LCO  
829 and ACG acknowledge Centre support from the Medical Research Council and Department for  
830 International Development. Kenyan school surveys and sample collections were funded by the  
831 Division of Malaria Control, Ministry of Public Health and Sanitation through a grant from DFID through  
832 the WHO Kenya Country Office. RWS acknowledges funded as a Principal Wellcome Fellow (103602 &  
833 212176). H-HC was funded by the National Institute of General Medical Sciences (U54GM088558). RV  
834 is funded by a Skills Development Fellowship: this award is jointly funded by the UK Medical Research  
835 Council (MRC) and the UK Department for International Development (DFID) under the MRC/DFID  
836 Concordat agreement and is also part of the EDCTP2 programme supported by the European Union.

837 **Author Contributions**

838 OJW drafted the paper. OJW, LO, ACG and RV conceptualized the study. OJW developed software with  
839 additional input from JH, HCS, HJTU and RV. OJW and RV conducted data analysis with additional input  
840 from H-HC, LCO and ACG. IO, PB, RWS, AMN, KR, CH, JIN, BG were involved in data collection. All  
841 authors contributed to interpretation of the analyses and revised the draft paper.

842 **Competing interests**

843 The authors declare no competing interests.

844 **Corresponding author**

845 Correspondence to Oliver J Watson ([o.watson15@imperial.ac.uk](mailto:o.watson15@imperial.ac.uk))

**Evaluating the performance of malaria genomics for inferring changes in transmission  
intensity using transmission modelling**

**Supplementary Material**



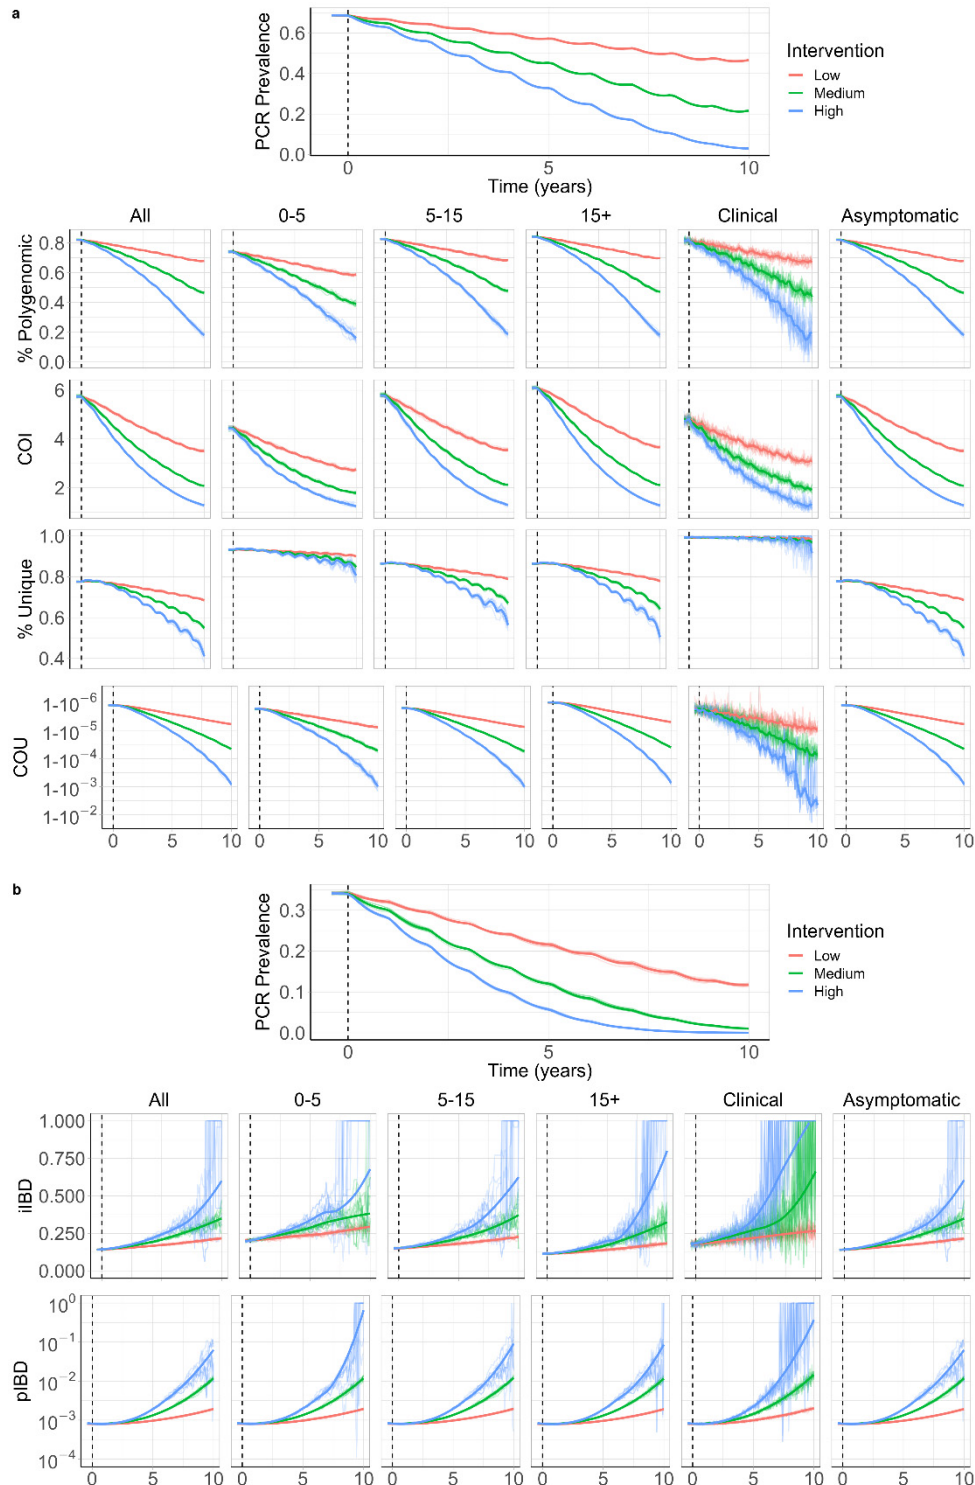

**Supplementary Figure 1: Age and sampling dependent impact of changes in transmission intensity upon genetic metrics of transmission intensity.** In **a**) the top plot shows the change in PCR prevalence after the introduction of 3 different levels of intervention scale up, with both the 10 individual stochastic realisations and the mean local regression smoothed relationship shown. The following four rows show the population mean percentage of the population that are polygenomically infected, the complexity of infection (COI), the percentage of samples that are genotypically unique (% Unique) and the coefficient of uniqueness (COU) for the prevalence declines seen in the first row. The metrics are stratified into columns by the sampling scheme chosen. In **b**) the top plot shows the change in PCR prevalence, which reaches <1% in the highest intervention arm. The following rows show the within host identity-by-descent (iIBD) mean across the 24 identity loci considered, and the population mean pairwise measure of IBD (pIBD). In both the same sampling stratification is used as in **a**). In all plots the vertical dashed black line shows the time from which the scale up of interventions starts (Time = 0 years).

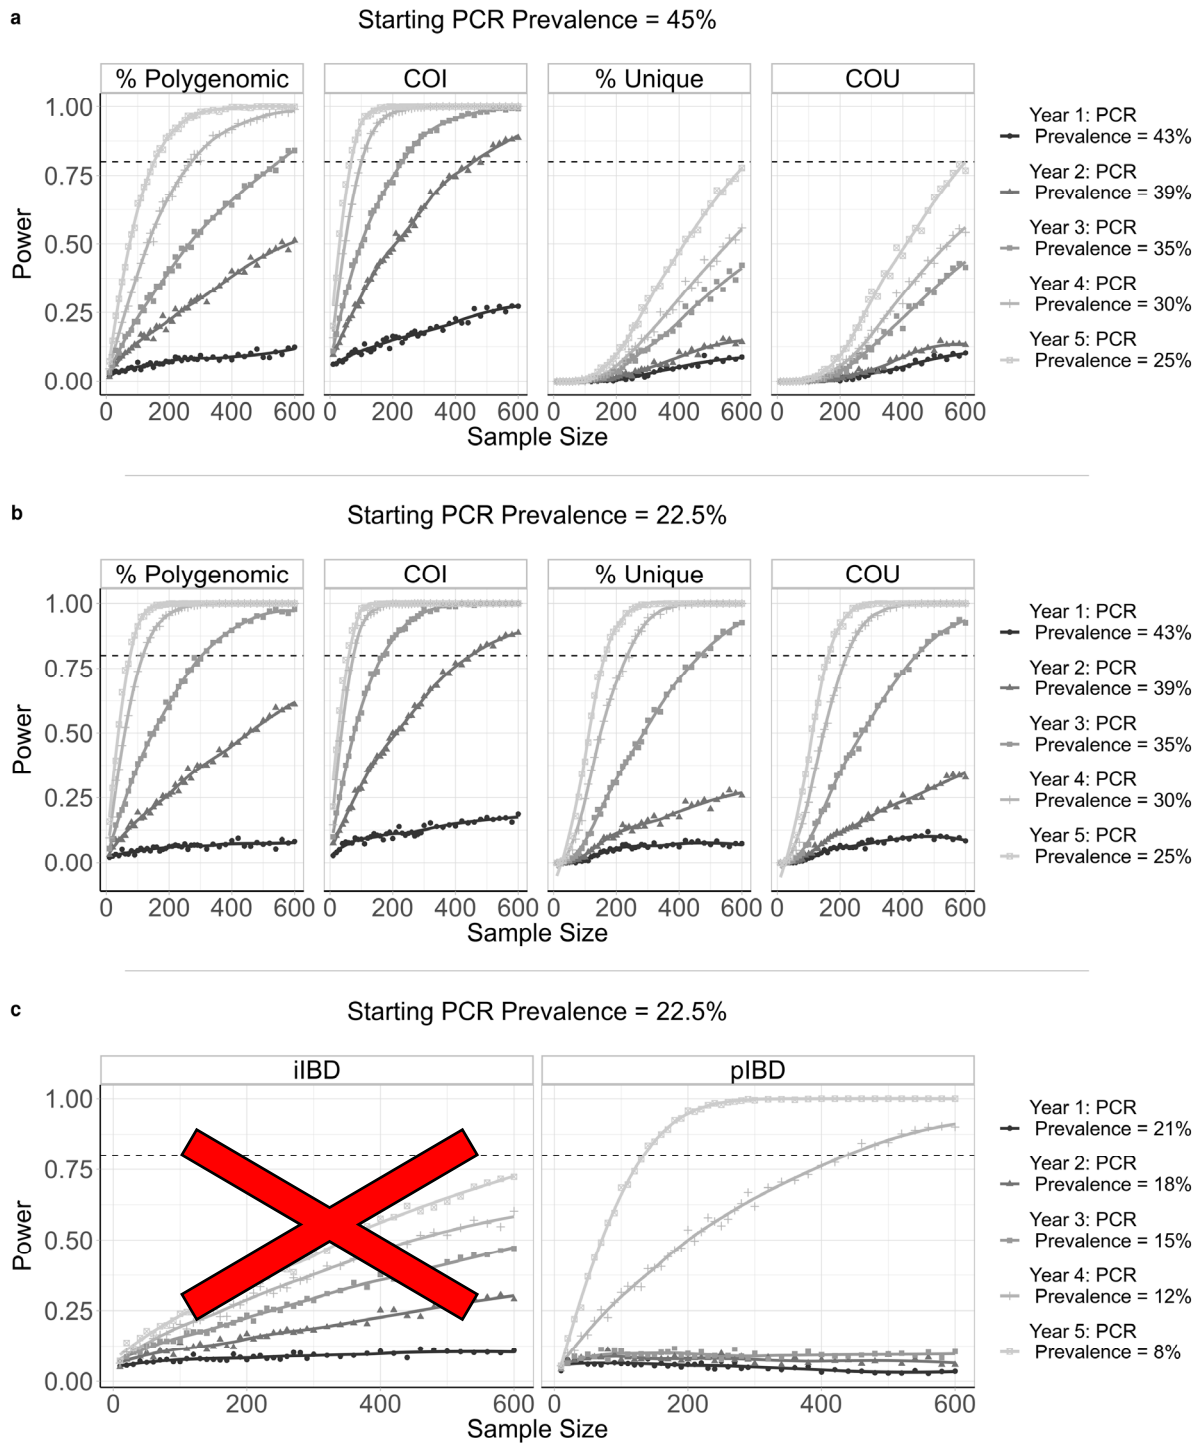

**Supplementary Figure 2: Predictive power of six metrics of parasite genetic diversity with respect to sample size under the assumptions that samples are unable to be phased.** The same methods as those detailed in the main text were used, with the only difference being that samples could not be phased and only the major haplotype could be called for an individual. iIBD is unable to be measured if samples cannot be phased and is subsequently crossed out. For pIBD, % Unique and COU it was assumed that the highest parasitaemia barcode was detected from each polygenomically infected individual. Lastly, there was no assumed difference in the ability to detect polygenomic samples or estimate the COI with unphased samples.

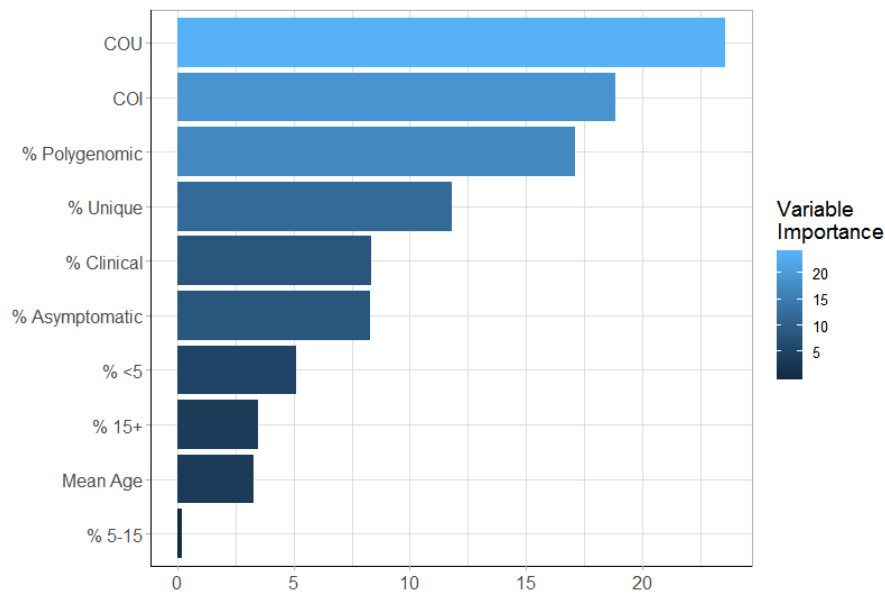

**Supplementary Figure 3: Mean Importance of each predictor variable within the trained ensemble model for predicting malarial prevalence.** The newly defined measure, the coefficient of uniqueness (COU), was observed to be the most important metric, with the six metadata variables (age and clinical status) being the least important. They do, however, contribute 28% of the total model importance, which highlights why the inclusion of this metadata resulted in better model predictions.

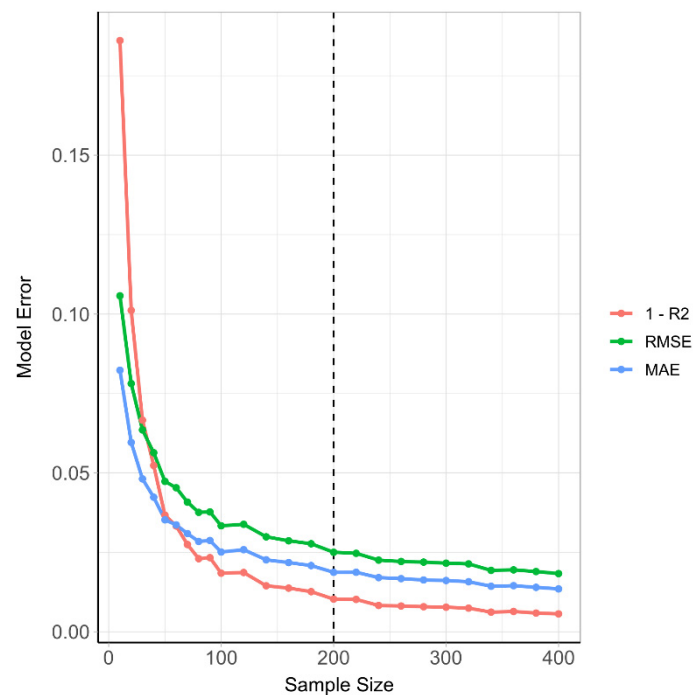

**Supplementary Figure 4: The predictive performance of the ensemble model under different assumed sample sizes.** Measures of the model error, root mean squared error (RMSE) and root mean error (MAE) as well as  $1 - R^2$  are shown for sample sizes between 10 and 400. Model performance improves quickly over sample size ranges between 10 and 100, before slowing, with only very modest increases seen in model performance for sample sizes larger than 200.

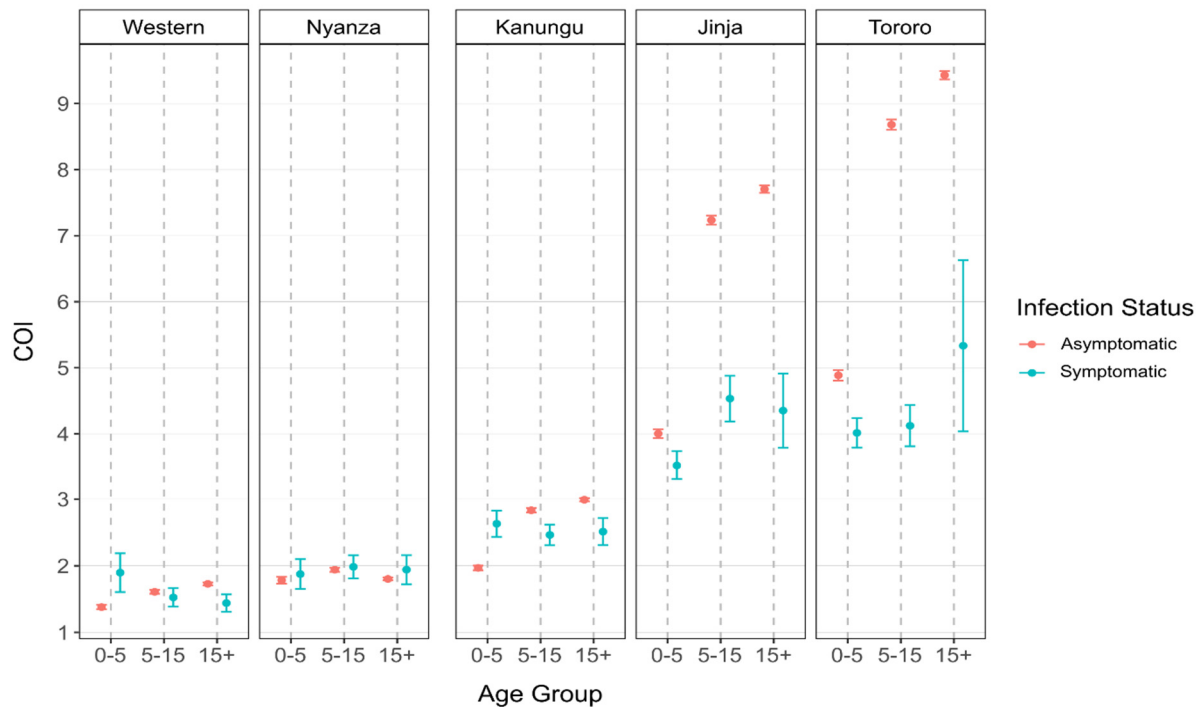

**Supplementary Figure 5: Age and symptomatic status stratified COI from model predictions during the model fitting.** Each plot shows the mean COI and 95% confidence interval for the study sites used in the model fitting. COI is stratified by age group and symptomatic status, showing that on the whole COI is higher in asymptomatic individuals, however, in lower transmission areas COI is higher in symptomatic young children.

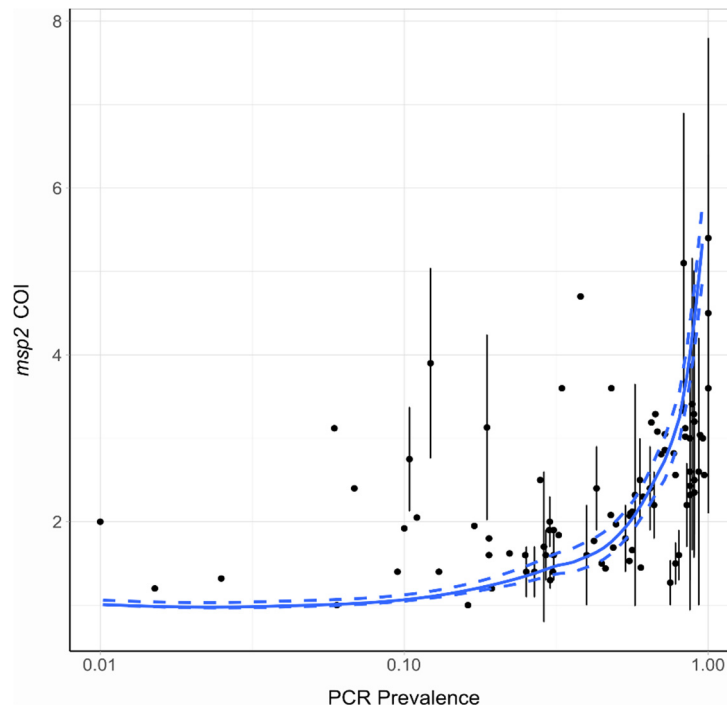

**Supplementary Figure 6: Model predicted relationship *msp2* COI and PCR prevalence.** The blue solid line shows the relationship for the fitted value of  $\zeta$  equal to 0.20. The dashed lines above and below this in blue show the relationship for values of  $\zeta$  equal to 0.29 and 0.10 respectively. The point-ranges in black show the observed values of COI by *msp2* genotyping from the literature review.

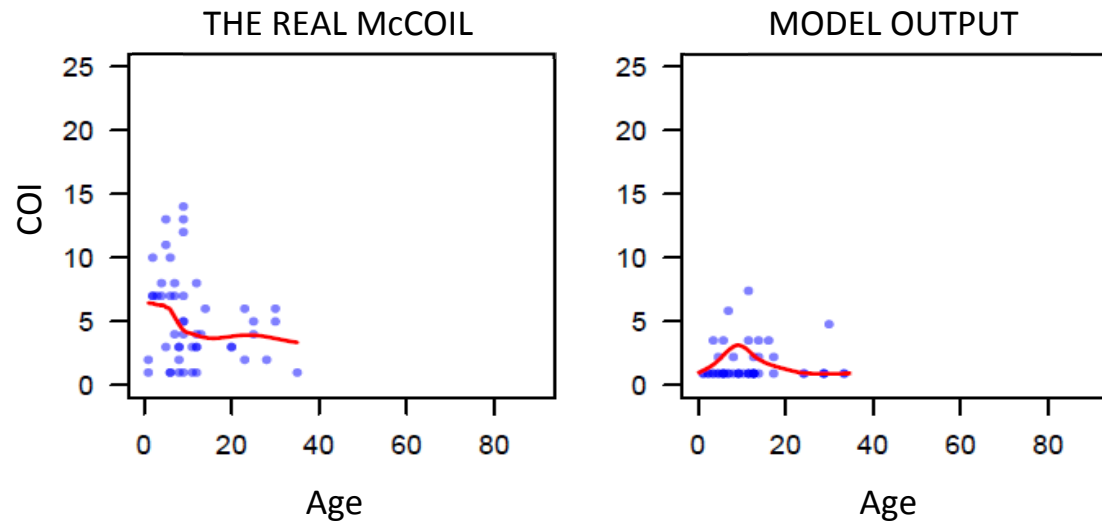

**Supplementary Figure 7: The fitted model-predicted relationship between COI and age for Walukuba, if the prevalence simulated was assumed to be equal to the prevalence within the sub-county surveyed, rather than the prevalence for the administrative region.** Model fitting conducted in Figure 1 in the main text used the administrative region prevalence as estimated by the Malaria Atlas Project, which resulted in good agreement between COI and prevalence.

**Supplementary Table 1: Statistical Model Performance.**

| Meta Data               | Model                  | RMSE*            | MAE*             | R <sup>2</sup> * |
|-------------------------|------------------------|------------------|------------------|------------------|
| None                    | Elastic Net            | 0.0276 (157.71%) | 0.0225 (173.08%) | 0.9935 (99.61%)  |
| None                    | Gradient Boosted Trees | 0.0214 (122.29%) | 0.0159 (122.31%) | 0.9961 (99.87%)  |
| None                    | Random Forest          | 0.0211 (120.57%) | 0.0151 (116.15%) | 0.9962 (99.88%)  |
| None                    | Weighted Mean Ensemble | 0.0204 (116.57%) | 0.0151 (116.15%) | 0.9965 (99.91%)  |
| Age                     | Elastic Net            | 0.0311 (177.71%) | 0.0245 (188.46%) | 0.9921 (99.47%)  |
| Age                     | Gradient Boosted Trees | 0.02 (114.29%)   | 0.0152 (116.92%) | 0.9967 (99.93%)  |
| Age                     | Random Forest          | 0.0197 (112.57%) | 0.0143 (110%)    | 0.9968 (99.94%)  |
| Age                     | Weighted Mean Ensemble | 0.0195 (111.43%) | 0.0144 (110.77%) | 0.9969 (99.95%)  |
| Age and Clinical Status | Elastic Net            | 0.0278 (158.86%) | 0.0219 (168.46%) | 0.9934 (99.6%)   |
| Age and Clinical Status | Gradient Boosted Trees | 0.0178 (101.71%) | 0.0141 (108.46%) | 0.9974 (100%)    |
| Age and Clinical Status | Random Forest          | 0.0178 (101.71%) | 0.013 (100%)     | 0.9973 (99.99%)  |
| Age and Clinical Status | Weighted Mean Ensemble | 0.0175 (100%)    | 0.013 (100%)     | 0.9974 (100%)    |

\* Absolute value (% relative to best performing model)

## **Supplementary Methods:**

### ***P. falciparum* Transmission Model**

An individual-based stochastic model with a fixed daily time step was developed to simulate the transmission dynamics of *Plasmodium falciparum*. Both the human and adult mosquito stages are modelled at an individual level, whereas parasites are modelled as discrete populations with each population relating to an infection event. The human transmission model is based upon previous modelling efforts<sup>1-4</sup>, which is described in its deterministic framework first, before detailing the human acquisition of immunity and the full set of equations detailing its stochastic implementation. The deterministic model described within the methods has been included as its equilibrium solution is used for model initialisation. Additionally, we developed a deterministic version of the earlier 2016 Griffin et al. model<sup>1</sup> that incorporates interventions, which is used to indirectly incorporate the effects of intervention strategies as these are not modelled explicitly within the individual model. (The deterministic implementation of interventions has not been included within the deterministic model described below to ensure clarity related to our indirect handling of interventions).

We continue to describe the mosquito transmission model, which is again based on earlier modelling efforts<sup>1-4</sup>, before describing the stochastic equations detailing the new implementation of the adult mosquito stage at an individual-based level. Extensions detailing how the parasite populations are incorporated follow, by first describing the genetic barcode that each parasite population possesses. We continue by describing the within host parasite populations, which includes considerations surrounding the contribution of coinfection and superinfection towards the model's dynamics of within-host multiplicities of infection, and how these relate to the probabilistic uptake of specific gametocyte strains by mosquitoes. This is followed by detailing the within-mosquito parasite populations, which explores the derivation of the distribution describing the model-predicted oocyte intensities, and describes how recombination within the sexual stage is explicitly modelled.

#### **Human transmission model**

Individuals begin life susceptible to infection (state S) (Diagram 1). At birth, individuals possess a level of maternal immunity that decays exponentially over the first 6 months. Each day individual  $i$  is probabilistically exposed to infectious bites governed by their individual force of infection ( $\Lambda_i$ ).  $\Lambda_i$  is dependent on their pre-erythrocytic immunity, exposure to bites (dependent on both their age and their individual relative biting rate due to heterogeneous biting patterns by mosquitoes) and the size of the infectious mosquito population. Infected individuals, after a latent period of 12 days ( $d_E$ ), develop either clinical disease (state D) or asymptomatic infection (state A). This outcome is determined by their probability of acquiring clinical disease ( $\phi_i$ ), which is dependent on their clinical immunity. Individuals that develop disease have a fixed probability ( $f_T$ ) of seeking treatment (state T). Treated individuals are assumed to always recover, i.e. fully-curative treatment, and then enter a protective state of prophylaxis (state P) at rate  $r_T$ , before returning to susceptible at rate  $r_S$ . Individuals that did not receive treatment recover to a state of asymptomatic infection at rate  $r_D$ . Asymptomatic individuals progress to a subpatent infection (stage U) at rate  $r_A$ , before clearing infection and returning to susceptible at rate  $r_U$ . Additionally, superinfection is possible for all individuals in states D, A and U. Superinfected

individuals who receive treatment will move to state T. Individuals who are superinfected but do not receive treatment in response to the superinfection will either develop clinical disease, thus moving to state D, or develop an asymptomatic infection and move to state A (except for individuals who were previously in state D, who will remain in state D).

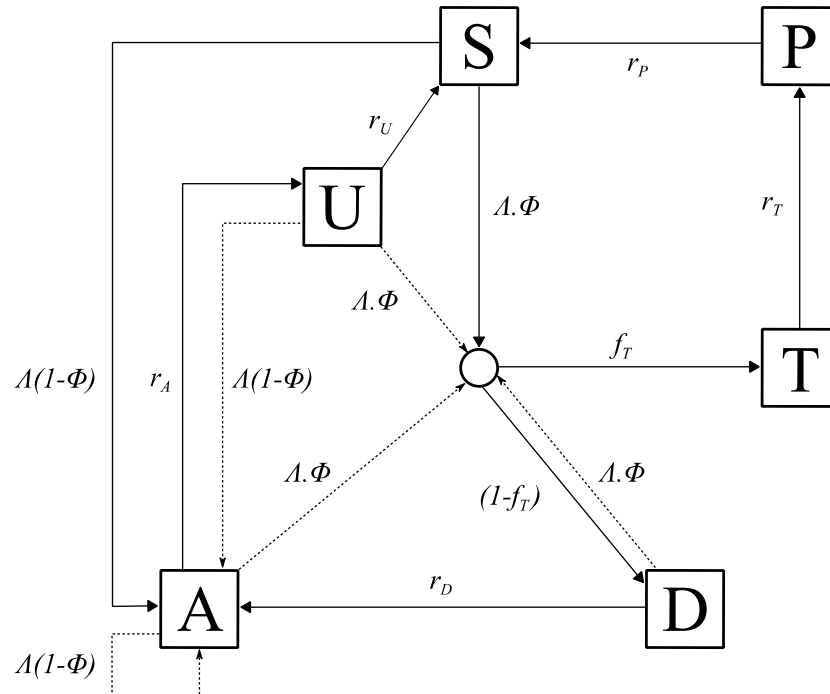

**Diagram 1: Transmission Model.** Flow diagram for the human component of the transmission model, with dashed arrows indicating superinfection. S, susceptible; T, treated clinical disease; D, untreated clinical disease; P, prophylaxis; A, asymptomatic patent infection; U, asymptomatic sub-patient infection. All parameters are described and referenced within Table 1.

The movement between the human components of the transmission model is summarised with the following partial differential equations describing each compartment ( $t$  represents time and  $a$  represents age):

$$\begin{aligned} \frac{\partial S}{\partial t} + \frac{\partial S}{\partial a} &= -\Lambda(t - d_E)S + \frac{P(t)}{d_P} + \frac{U(t)}{d_U} \\ \frac{\partial T}{\partial t} + \frac{\partial T}{\partial a} &= \phi f_T \Lambda(t - d_E)(S(t) + D(t) + A(t) + U(t)) - \frac{T(t)}{d_T} \\ \frac{\partial D}{\partial t} + \frac{\partial D}{\partial a} &= \phi(1 - f_T) \Lambda(t - d_E)(S(t) + A(t) + U(t)) - \frac{D(t)}{d_D} \\ \frac{\partial A}{\partial t} + \frac{\partial A}{\partial a} &= (1 - \phi) \Lambda(t - d_E)(S(t) + U(t)) + \frac{D(t)}{d_D} - \phi \Lambda A(t) - \frac{A(t)}{d_A} \\ \frac{\partial U}{\partial t} + \frac{\partial U}{\partial a} &= \frac{A(t)}{d_A} - \frac{U(t)}{d_U} - \Lambda(t - d_E)U(t) \\ \frac{\partial P}{\partial t} + \frac{\partial P}{\partial a} &= \frac{T(t)}{d_T} - \frac{P(t)}{d_P} \end{aligned}$$



When an individual enters a new infection state a waiting time is sampled from an exponential distribution for when the individual will move out of that infection state (except when individuals move into S). With the introduction of a fixed daily time-step, the day on which an individual transitions from state X to Y occurs is given by:

$$Day(X \rightarrow Y) \sim floor(Exp(\lambda)) + t_{now} + 1$$

where  $t_{now}$  is the current day, i.e. the day that the individual moved into state A, and  $\lambda$  is the transition rate. The set of state transitions for individuals and their associated transition rates are given below.

| Process                                                          | Transition | Transition Rate       |
|------------------------------------------------------------------|------------|-----------------------|
| Progression of untreated disease to asymptomatic infection       | D → A      | $r_D = \frac{1}{d_D}$ |
| Progression of asymptomatic infection to subpatent infection     | A → U      | $r_A = \frac{1}{d_A}$ |
| Progression of subpatent infection to susceptible                | U → S      | $r_U = \frac{1}{d_U}$ |
| Progression of treated disease to uninfected prophylactic period | T → P      | $r_T = \frac{1}{d_T}$ |
| Progression from uninfected prophylactic period to susceptible   | P → S      | $r_P = \frac{1}{d_P}$ |

We assume that each person has a unique biting rate, which is the product of their relative age dependent biting rate,  $\psi_i$ , given by

$$\psi_i(a) = \frac{\sum_{i=1}^n \psi_i(a)}{n} \left(1 - \rho \exp\left(\frac{a}{a_0}\right)\right)$$

and an assumed heterogeneity in biting patterns of mosquitoes,  $\zeta_i$ , which we assume persists throughout their lifetime and is drawn from a log-normal distribution with a mean of 1,

$$\log(\zeta_i) \sim N\left(\frac{-\sigma^2}{2}, \sigma^2\right)$$

where  $1 - \rho$  is the relative biting rate at birth when compared to adults and  $a_0$  represents the time-scale at which the biting rate increases with age. The product of these biting rates is subsequently used to calculate the proportion of the whole population's bites that person  $i$  receives on a given day,  $\pi_i$ . Their daily entomological inoculation rate (EIR),  $\epsilon_i$ , is thus calculated by multiplying by the number of infectious mosquitoes taking a blood meal from a human that day, which in turn yields their force of infection, which are given by:

$$\begin{aligned}\pi_i &= \zeta_i \psi_i \\ \epsilon_i &= I_{M\_Feeding} \pi_i \\ \Lambda_i &= \epsilon_i b_i\end{aligned}$$

where  $I_{M\_Feeding}$  is the size of the feeding infectious mosquito population, and  $b_i$  is the probability of infection given an infectious mosquito bite.

The inclusion of individual mosquitoes results in the following stochastic implementation of infection. On any given day the number of infectious mosquitoes taking a blood meal from a human ( $I_{M\_Feeding}$ ) will result in the same number of infectious bites. These bites are allocated by sampling from the multinomial distribution using the conditional binomial method,<sup>5</sup> where sample weights are equal to  $\pi_i$ . Upon receiving an infectious bite, an individual will move to an untracked infection state,  $I$ , which leads to either clinical disease ( $D$ ), treated clinical disease ( $T$ ) or asymptomatic infection ( $A$ ). This leads to the following transition rates related to infection below.

| Process                                                                                        | Transition                                                  | Transition Rate      |
|------------------------------------------------------------------------------------------------|-------------------------------------------------------------|----------------------|
| Infection                                                                                      | $S \rightarrow I$                                           | $\Lambda_i(t - d_E)$ |
| Super-infection from untreated clinical disease, asymptomatic infection or subpatent infection | $D \rightarrow I$<br>$A \rightarrow I$<br>$U \rightarrow I$ | $\Lambda_i(t - d_E)$ |

The probabilities of progressing from state  $I$  to  $D$ ,  $T$  or  $U$  are determined an individual's probability of clinical disease,  $\phi_i$ , and the treatment coverage:

$$Prob(\text{Clinical Disease}) = \phi_i$$

$$Prob(\text{Treated Clinical Disease} | \text{Clinical Disease}) = f_T$$

The human population was assumed to have a maximum possible age of 100 years, with an average age of 21 years within the population yielding an approximately exponential age distribution typical of sub-Saharan countries. The day on which a human dies is thus allocated at birth by sampling from an exponential distribution with a mean equal to 21 years. When an individual dies, they are replaced with a new-born individual with the same individual biting rate due to heterogeneity in biting patterns.

### Immunity and Detection Functions

We model 3 stages at which immunity may impact transmission, as in the existing Griffin et al model:

1. Pre-erythrocytic immunity,  $I_B$ ; reduction in the probability of infection given an infectious mosquito bite.
2. Acquired and Maternal Clinical Immunity,  $I_{CA}$  and  $I_{CM}$  respectively; reduction in the probability of clinical disease given an infection due to the effects of blood stage immunity.
3. Detection immunity,  $I_D$ ; reduction in the probability of detection and a reduction in the

Maternal clinical immunity is assumed to be at birth a proportion,  $P_M$ , of the acquired immunity of a 20 year-old and to decay at rate  $\frac{1}{a_M}$ . The remaining three types of immunity are described by the following partial differential equations, which describe how immunity increases due to exposure from zero at birth and decreases over time:

$$\begin{aligned}\frac{\partial I_B}{\partial t} + \frac{\partial I_B}{\partial a} &= \frac{\epsilon}{\epsilon u_B + 1} - \frac{I_B}{d_B} \\ \frac{\partial I_{CA}}{\partial t} + \frac{\partial I_{CA}}{\partial a} &= \frac{\Lambda}{\Lambda u_C + 1} - \frac{I_{CA}}{d_{CA}} \\ \frac{\partial I_D}{\partial t} + \frac{\partial I_D}{\partial a} &= \frac{\Lambda}{\Lambda u_D + 1} - \frac{I_D}{d_{ID}}\end{aligned}$$

where each  $u$  term represents the time during which immunity cannot be boosted further after a previous boost and each  $d$  term represents the duration of immunity.

The probabilities of infection, detection and clinical disease are subsequently created by transforming each immunity function by Hill functions. An individual's probability of infection,  $b_i$ , is given by

$$b_i = b_0 \left( b_1 + \frac{1 - b_1}{1 + \left(\frac{I_B}{I_{B0}}\right)^{\kappa_B}} \right)$$

where  $b_0$  is the maximum probability due to no immunity,  $b_0 b_1$  is the minimum probability and  $I_{B0}$  and  $\kappa_B$  are scale and shape parameters respectively.

An individual's probability of clinical disease,  $\phi_i$ , is given by

$$\phi_i = \phi_0 \left( \phi_1 + \frac{1 - \phi_1}{1 + \left(\frac{I_{CA} + I_{CM}}{I_{C0}}\right)^{\kappa_C}} \right)$$

where  $\phi_0$  is the maximum probability due to no immunity,  $\phi_1 \phi_0$  is the minimum probability and  $I_{C0}$  and  $\kappa_C$  are scale and shape parameters respectively.

An individual's probability of being detected by microscopy when asymptomatic,  $q_i$ , is given by

$$q_i = d_1 + \left( \frac{1 - d_1}{1 + \left(\frac{I_D}{I_{D0}}\right)^{\kappa_D}} f_D \right)$$

where  $d_1$  is the minimum probability due to maximum immunity, and  $I_{D0}$  and  $\kappa_D$  are scale and shape parameters respectively.  $f_D$  is dependent only on an individual's age is given by

$$\frac{df_D}{da} = 1 - \frac{1 - f_{D0}}{1 + \left(\frac{a}{a_D}\right)^{\gamma_D}}$$

where  $f_{D0}$  represents the time-scale at which immunity changes with age, and  $a_D$  and  $\gamma_D$  are scale and shape parameters respectively.

The probability that an infected individual infects a mosquito upon being bitten is proportional to both their infectious state and their probability of detection, with a lower probability of detection assumed to correlate with a lower parasite density. Individuals who are in state D (clinically diseased), state U (sub-patent infection) and state T (receiving treatment) contribute to an onward infection within a mosquito with probabilities  $c_D$ ,  $c_U$  and  $c_T$ . In state A, contribution to an onward infection within a mosquito occurs with probability  $c_A$ , and is given by  $c_U + (c_D - c_U)q^{\gamma_I}$  where  $q$  is the probability of being detected by microscopy when asymptomatic, and  $\gamma_I$  is a parameter that controls how quickly infectiousness falls within the asymptomatic state.

### Human Stochastic Model Equations

Given the definitions above, the full stochastic individual-based human component of the model can be formally described by its Kolmogorov forward equations. As before, let  $i$  index individuals in the population. Then the state of individual  $i$  at time  $t$  is given by  $\{j, k, t_k, l, t_l, m, t_m, a, t\}$ , where  $a$  is age,  $j$  represents infection status ( $S, D, A, U, T$  or  $P$ ),  $k$  is the level of infection-blocking immunity and  $t_k$  is the time at which infection blocking immunity was last boosted. Similarly,  $l$  and  $t_l$  denote the level and time of last boosting of clinical immunity, respectively, while  $m$  and  $t_m$  do likewise for parasite detection immunity. Let  $\delta_{p,q}$  denote the Kronecker delta ( $\delta_{p,q} = 1$  if  $p = q$  and 0 otherwise) and  $\delta(x)$  denote the Dirac delta function. Defining  $P_i(j, k, t_k, l, t_l, m, t_m, a, t)$  as the probability density function for individual  $i$  being in state  $\{j, k, t_k, l, t_l, m, t_m, a, t\}$  at time  $t$ , the time evolution of the system is governed by the following forward equation:

$$\begin{aligned} & \frac{\partial P_i(j, k, t_k, l, t_l, m, t_m, a, t)}{\partial t} + \frac{\partial P_i(j, k, t_k, l, t_l, m, t_m, a, t)}{\partial a} = \\ & \delta_{j,S} [r_P P_i(P, k, t_k, l, t_l, m, t_m, a, t) + r_U P_i(U, k, t_k, l, t_l, m, t_m, a, t)] \\ & + \delta_{j,A} [r_D P_i(D, k, t_k, l, t_l, m, t_m, a, t)] \\ & + \delta_{j,U} [r_A P_i(A, k, t_k, l, t_l, m, t_m, a, t)] \\ & + \delta_{j,P} [r_T P_i(T, k, t_k, l, t_l, m, t_m, a, t)] \\ & + (1 - b_i) \epsilon_i (t - d_E) [\delta_{j,S} + \delta_{j,D} + \delta_{j,A} + \delta_{j,U}] \mathcal{O}_b \diamond P_i(j, k, t_k, l, t_l, m, t_m, a, t) \\ & + b_i \epsilon_i (t - d_E) [\delta_{j,A} (1 - \phi_i) + \delta_{j,D} \phi_i (1 - f_T) + \delta_{j,T} \phi_i f_T] \mathcal{O}_b \diamond \mathcal{O}_c \diamond \mathcal{O}_d \diamond \sum_{j' \in \{S, A, U\}} P_i(j', k, t_k, l, t_l, m, t_m, a, t) \\ & + b_i h_i (t - d_E) \mathcal{O}_b \diamond \mathcal{O}_c \diamond \mathcal{O}_d \diamond P_i(D, k, t_k, l, t_l, m, t_m, a, t) \\ & + \left[ r_B k \frac{\partial}{\partial k} + r_{CA} l \frac{\partial}{\partial l} + r_{ID} m \frac{\partial}{\partial m} \right] P_i(j, k, t_k, l, t_l, m, t_m, a, t) \\ & + \mu \delta(a) \delta(t_k + T_{big}) \delta(t_l + T_{big}) \delta(t_m + T_{big}) \delta_{j,S} \delta_{k,0} \delta_{l,0} \delta_{m,0} \sum_{j'} P_i(j', k, t_k, l, t_l, m, t_m, a, t) \\ & - \left[ \mu + r_P \delta_{j,P} + r_U \delta_{j,U} + r_D \delta_{j,D} + r_A \delta_{j,A} + r_T \delta_{j,P} \right. \\ & \quad \left. + h_i (t - d_E) [\delta_{j,S} + \delta_{j,D} + \delta_{j,A} + \delta_{j,U}] \right] P_i(j, k, t_k, l, t_l, m, t_m, a, t) \end{aligned}$$

Here  $\mathcal{O}_b$ ,  $\mathcal{O}_c$  and  $\mathcal{O}_d$  are commutative integral operators with the following action on a density  $f(j, k, t_k, l, t_l, m, t_m, a, t)$ :

$$\mathcal{O}_b \diamond f = \delta(t - t_k) \int_0^\infty f(j, k - 1, t - u_B - \tau, l, t_l, m, t_m, a, t) d\tau + \theta\left(\frac{t - t_k}{u_B}\right) f(j, k, t_k, l, t_l, m, t_m, a, t)$$

$$\mathcal{O}_c \diamond f = \delta(t - t_l) \int_0^\infty f(j, k, t_k, l - 1, t - u_C - \tau, m, t_m, a, t) d\tau + \theta\left(\frac{t - t_l}{u_C}\right) f(j, k, t_k, l, t_l, m, t_m, a, t)$$

$$\mathcal{O}_d \diamond f = \delta(t - t_m) \int_0^\infty f(j, k, t_k, l, t_l, m - 1, t - u_D - \tau, a, t) d\tau + \theta\left(\frac{t - t_m}{u_D}\right) f(j, k, t_k, l, t_l, m, t_m, a, t).$$

Finally,  $\theta(x)$  is an indicator function such that  $\theta(x) = 1$  if  $x < 1$  and 0 otherwise.

For simulation, a discrete time approximation of this stochastic model was used, with a time-step of 1 day. For each individual  $k$ ,  $l$  and  $m$  are set to zero at birth, while  $t_k$ ,  $t_l$  and  $t_m$  are set to a large negative value  $-T_{big}$  (to represent never having been exposed or infected, i.e. their immunity will always be boosted upon their first exposure or infection event). Each immunity term increases by 1 for an individual whenever that individual receives an infectious bite ( $k$ ), or is infected ( $l$  and  $m$ ), if the previous boost to  $k$ ,  $l$  and  $m$  occurred more than  $u_B$ ,  $u_C$  and  $u_D$  days earlier, respectively. Immunity levels decay exponentially at rate  $r_B$ ,  $r_{CA}$  and  $r_{ID}$ , where  $r_B$ ,  $r_{CA}$  and  $r_{ID}$  are equal to  $\frac{1}{d_B}$ ,  $\frac{1}{d_{CA}}$  and  $\frac{1}{d_{ID}}$  respectively.

### Mosquito Population Dynamics

The adult stage of mosquito development was modelled individually and is similarly described in its deterministic framework before exploring its stochastic implementation. Adult mosquitoes will begin life susceptible to infection ( $S_M$ ), and will seek a blood meal on the same day they are born and every 3 days after that until the mosquito dies. Each feeding day, mosquito  $i$  will be exposed to a force of infection,  $\Lambda_{Mi}$ , depending on the infection status and immunity of the human the mosquito is feeding on. The overall force of infection towards the mosquito population on a given day,  $\Lambda_M$ , is thus represented by the sum of the onward infection contributions from each infected human, delayed by  $d_g$ , delay due gametocytogenesis, which is given by

$$\Lambda_M = \alpha_k Q_0 \left( \sum_{i=1}^{\Sigma_D} \pi_i c_D + \sum_{i=1}^{\Sigma_T} \pi_i c_T + \sum_{i=1}^{\Sigma_A} \pi_i c_A + \sum_{i=1}^{\Sigma_U} \pi_i c_U \right) (t - d_g)$$

where  $\alpha_k$  is the daily rate at which a mosquito takes a blood meal,  $Q_0$  is the proportion of bites that are on humans (anthropophagy) and  $d_g$  represents the delay from emergence of asexual blood-stage parasites to sexual gametocytes that contribute towards onward infectivity. Infected mosquitoes then pass through a latent infection stage ( $E_M$ ) that will last 10 days representing the extrinsic incubation period for the parasite ( $d_{EM}$ ), before becoming infectious to humans ( $I_M$ ). Infectious mosquitoes remain infectious until they die. Whenever a mosquito dies, it is replaced with a new susceptible adult mosquito. Analogously to the human model, when a new adult mosquito emerges, the day on which it dies is drawn from an exponential distribution with a transition rate of  $\mu_M = 0.132$  days. The differential equations summarising the adult stage of mosquitoes are given by

$$\begin{aligned}\frac{dS_M}{dt} &= \mu_M M_v - \mu_M S_M - \Lambda_M S_M \\ \frac{dE_M}{dt} &= \Lambda_M S_M - \mu_M E_M - \Lambda_M (t - d_{EM}) S_M (t - d_{EM}) \exp^{-\mu_M d_{EM}} \\ \frac{dI_M}{dt} &= \Lambda_M (t - d_{EM}) S_M (t - d_{EM}) \exp^{-\mu_M d_{EM}} - \mu_M I_M\end{aligned}$$

where  $\mu_M$  is the daily death rate of adult mosquitoes, and  $M_v$  is the total mosquito population, i.e.  $S_M + E_M + I_M$ .

### Mosquito Stochastic Model Equations

As with the human transmission model, the full stochastic individual-based mosquito component of the model can be formally described by its Kolmogorov forward equations. As before, let  $i$  denote each mosquito in the population, and  $j$  denote their infection status. Let  $\delta_{p,q}$  denote the Kronecker delta function such that it equals 1 if  $p = q$  and 0 otherwise. Defining  $P_i(j, t)$  as the probability density function for mosquito  $i$  being in state  $\{j, t\}$  at time  $t$ , the time evolution of the system is governed by the following forward equation:

$$\begin{aligned}\frac{\partial P_i(j, t)}{\partial t} &= \delta_{j,E_M} [\Lambda_{Mi} (P_i(S_M, t))] + \delta_{j,I_M} [\Lambda_{Mi} (t - d_{EM}) (P_i(S_M, t))] \\ &\quad + \delta_{j,S_M} \mu_M [P_i(S_M, t) + P_i(E_M, t) + P_i(I_M, t)] \\ &\quad - P_i(j, t) [\mu_M + \Lambda_{Mi} [\delta_{j,S_M}] + \Lambda_{Mi} (t - d_{EM}) [\delta_{j,S_M}]]\end{aligned}$$

### Seasonality and Intervention Strategies

In simulations in which no seasonality is assumed,  $M_v$  remains constant throughout, i.e. whenever a mosquito dies it is always replaced. When seasonality is incorporated, the maximum value that  $M_v$  can be oscillates with a period of 365 days. This corresponds to a change in the birth rate of mosquitoes that reflects an assumed impact upon the seasonal carrying capacity of the environment as a result of rainfall patterns upon mosquito larval stage development. In these simulations, when a mosquito dies, it will only be replaced if the current total number of mosquitoes is less than the maximum value that  $M_v$  can be. In simulations designed to replicate regional settings, a rainfall curve,  $R(t)$ , was estimated from rainfall data from 2002 to 2009 for the related first-administrative unit using the first three frequencies of the Fourier-transformed data.<sup>6</sup> The seasonal total mosquito population size,  $M_v(t)$ , is thus given by

$$M_v(t) = M_{v_0} \frac{R(t)}{\bar{R}}$$

Where  $\bar{R}$  is the mean annual rainfall, and  $M_{v_0}$  represents the seasonal harmonic mean population size.

The computational constraints introduced by modelling individual mosquitoes and parasite population genetic dynamics necessitated modelling intervention strategies indirectly. This was handled by assuming that an introduction of intervention leads to a decrease in the average age of the mosquito population throughout the duration of the intervention due to an increased mortality rate. As a result, the average age reflects a new composite mortality rate due to both interventions and external causes. Similarly it leads to an increase in  $Q_0$  to reflect mosquitoes that are repelled as a result of interventions but do not die. The daily rate of change to these parameters in response to ITN and IRS coverage is calculated using an equivalent deterministic version of the

earlier model that included interventions,<sup>1</sup> before being introduced as a time-dependent variable within the stochastic model.

## Parasite Dynamics

### Parasite Genetic Barcode

Parasites are modelled as discrete populations as a result of an infection event associated with a mosquito or a human. Each asexual parasite is characterised by one genetic barcode, which contains information relating to 24-SNPs distributed across the parasite genome. These SNPs represent an increasingly used general SNP-based molecular barcode that has been used for the identification and tracking of *P. falciparum* clones.<sup>7</sup> Sexual stages of the parasite lifecycle within the mosquito are represented by both a female and male barcode, thus defining the range of recombinants that could be produced. The within human parasite dynamics and model considerations are discussed first before exploring the within mosquito parasite life cycle and associated modelling implications. A schematic overview of the modelled parasite lifecycle stages is shown in Diagram 2.

In simulations modelling identity-by-descent (IBD), we extend the barcode to consider 24 “identity-loci”. An identity loci can take any integer value required, allowing true identities to be compared. In the SNP-loci barcode, each loci can only be 0 or 1, representing the minor and major allele for that barcode loci.

### Within Human Parasite Dynamics

During a successful mosquito to human infection event, a number of asexual parasite barcodes are introduced into the human, which may be observed in the ensuing gametocyte genotypes when considering onward infectiousness from humans to mosquitoes. If the individual’s pre-erythrocytic immunity was boosted in the last  $u_B$  days no new parasite barcodes will be passed to the individual, otherwise more than one different asexual parasite barcode that will be observed in the ensuing gametocyte genotypes may be introduced during an infection event, representing cotransmission of genetically related parasites (if the mosquito was infected with more than one sporozoite genotype). The precise distribution describing the number of genotypes is unknown,<sup>8</sup> but the mean number of sporozoites within an inoculation event is well characterised by a geometric distribution with mean equal to 10. The geometric mean will then be used to estimate the proportion of sporozoites that are successful,  $\xi$ , which yields the maximum number of successful sporozoites in an individual with no pre-erythrocytic immunity. If this number is less than 1, then a new total number of sporozoites is drawn until the maximum number of sporozoites after incorporating  $\xi$  is greater than 0. The observed number of successful sporozoites is then calculated by conducting Bernoulli trials for all but one of the successful sporozoites (as we assume one has to survive to found the infection) to see if they are successful, calculated using the individual’s probability of infection,  $b_i$ . In summary this can be written as:

$$\begin{aligned} Total_{spz} &\sim Geom(p_{spz}) \\ Max_{spz} &= round(Total_{spz} \cdot \xi) \\ Observed_{spz} &= 1 + \sum_1^{Max_{spz}-1} bernoulli(b_i) \end{aligned}$$



There is no assumed maximum number of parasites, with individuals assumed to clear strains on the day that they would have moved from a subpatent infection to susceptible for the strain considered, i.e. each acquired strain follows an assumed trajectory in parasitaemia representative of a normal infection cycle, i.e. with a mean duration of infectiousness equal to  $d_A + d_U$ . Acquired strains can thus move “infection state” independently of the human’s infection state. For example, a given individual is infected on day 0 and develops an asymptomatic infection. The individual is scheduled to become subpatent on day 200, but they were bitten on day 150 and developed clinical symptoms and moved to state D. When this happens, the parasite density of the strain acquired on day 0 does not change and this strain will become a subpatent strain on day 200. After day 200, its probability of being onwardly transmitted is thus equal to  $c_U$ . After the parasite has moved to become a subpatent strain, the day at which the strain would have been cleared, i.e. the individual would have moved from state U to S if they had not been superinfected, is drawn and assigned to the parasite. On this drawn day the subpatent parasite strain is assumed to have been cleared. By tracking parasites in this way we are able to track the relative parasitemias of each acquired strain, enabling more accurate sampling of within host parasite genetic diversity when passing on gametocytes to mosquitoes as well as enabling an equilibrium between clearing old strains and acquiring new strains, which represents the multiplicity of infection. This is shown in the schematic below (Diagram 2), which also details the key features of the barcode.

### Within mosquito parasite dynamics

When a mosquito is infected, we sample from a zero-truncated negative binomial distribution that describes the distribution of oocysts that form from a feeding event. The choice of a zero truncated negative binomial represents the increasingly identified zero-inflated negative binomial that describes the relationship between oocyst prevalence and mean oocysts per mosquito in SMFA studies.<sup>9-11</sup> The related negative binomial distribution for the distribution of oocysts is given by

$$X_{oocysts} \sim NB(size_{oocysts}, shape_{oocysts})$$

where  $X_{oocysts}$  represents the number of oocysts that will be formed, with mean equal to 2.5 and a shape equal to 1, which captures the mean and range of oocysts observed in natural *P. falciparum* infections<sup>9,10,12</sup> For each oocyst formed, two barcodes are sampled from the infected host representing the female and male gametes that led to the oocysts formation. These two barcodes will result in up to 4 different potential genotypes (reflecting the immediate two step meiotic division that takes place after zygote formation) represented within the sporozoite population within the oocyst. When an infectious mosquito seeks a blood meal and leads to an onward infection, a value for  $Observed_{spz}$  is sampled. The oocyst source for each onward infection within a coinfection is sampled from oocysts that have ruptured, i.e. the infection event that led to the oocyst occurred more than 10 days earlier. At this point recombination is simulated by randomly choosing either the male or female allele at each SNP position in the barcode. The random sampling in this represents the assumed independent segregation events resulting from the absence of genetic linkage between barcode SNP positions. Once a recombinant has been simulated it is stored and associated with the oocyst from which it came. If the same oocyst is chosen to lead to an additional infection, then the previously generated recombinant has a 25% chance of being onwardly transmitted and there is a 75% chance that a new recombinant is generated and

subsequently saved. This process will continue in ensuing onward infection events that result from this oocyst until four recombinants have been simulated, at which point they each have a 25% chance of being onwardly transmitted. The above thus introduces an assumption that sporozoites will remain onwardly-transmissible for the remainder of the mosquito's life, with no effect upon their relative probability of being onwardly transmitted in relation to sporozoites that resulted from a more recently ruptured oocyst.

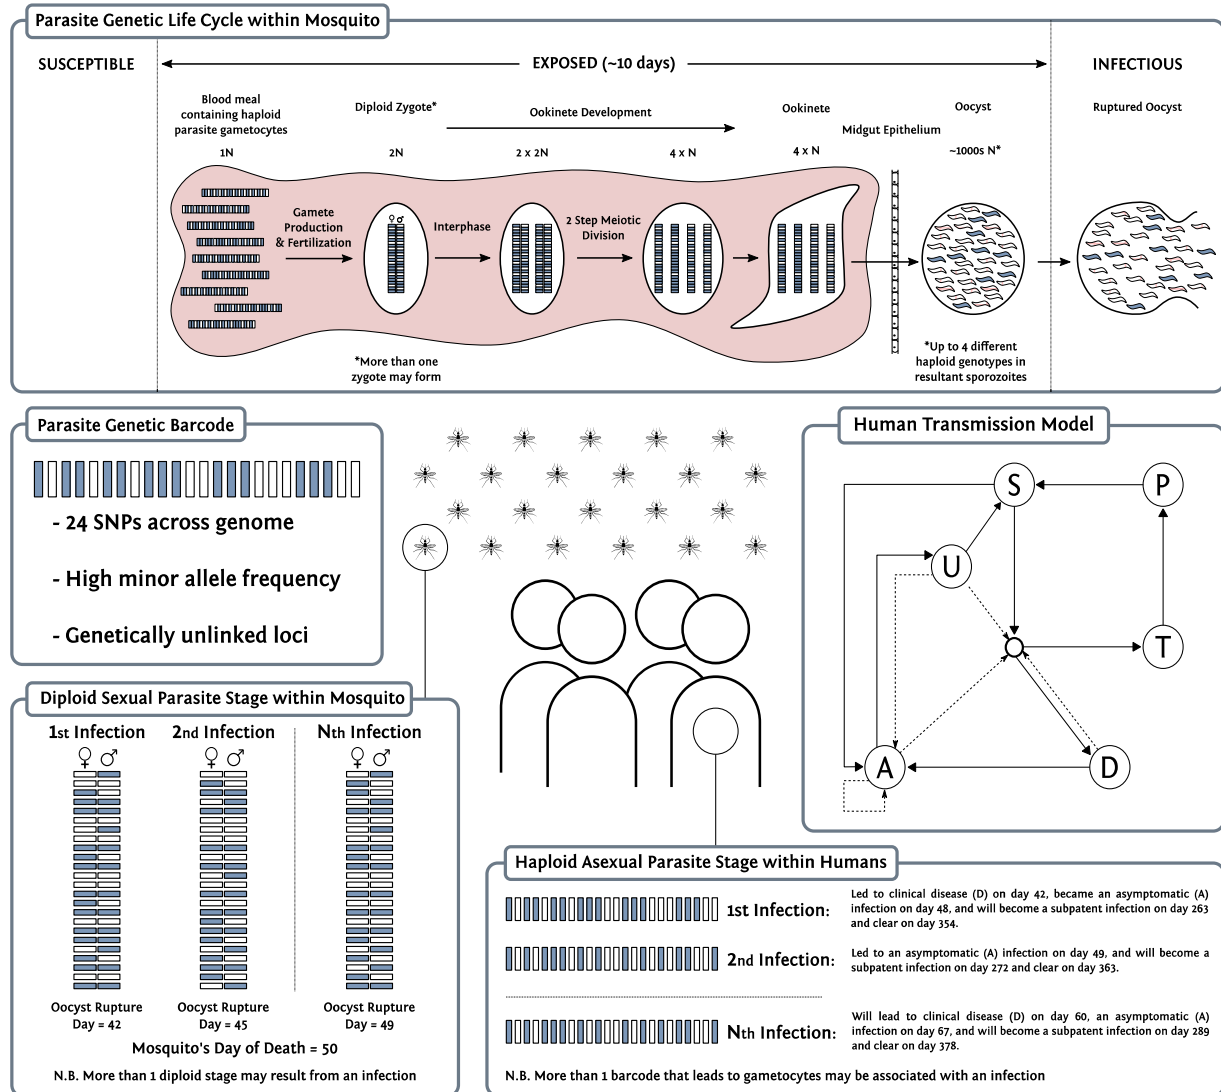

**Diagram 2: Parasite Dynamics within the transmission model.** Individual mosquitoes are tracked, which allows for recombination to be modelled explicitly. Populations of parasite clones are tracked, and multiple oocysts are able to be formed from a feeding event, as well as multiple genetically distinct sporozoites onwardly transmitted. A "barcode" is associated with each parasite clone and can either represent biallelic SNPs, or unique identities that allow IBD to be calculated.

### Importation Rate

The non-spatial, closed population nature of the model will result in the eventual fixation of a single genetic barcode. As such, when conducting simulations designed to replicate regional settings, an estimate of the importation rate was calculated, yielding to a daily probability that an infection is due to an imported case. The importation rate represents the sum of two different flows of infection into a regional setting:

- A. Individuals who are infected outside the region while travelling to and from other areas
- B. Visiting travellers from outside the region who infect mosquitoes within the admin unit

These two process are incorporated at the same stage within the model, whereby there is a temporally dependent daily probability that a generated recombinant genotype is due to an importation as follows

$$Prob(Importation) = \delta_{imports}(t)$$

where  $\delta_{imports}(t)$  is the population proportion of new infections resulting from importations on a given day. This parameter changes over time to reflect changes in regional seasonality (both within the region and neighbouring regions), and different rates of change in malaria prevalence across neighbouring regions.<sup>13</sup> If the recombinant is due to an importation, then a random barcode is produced and passed on. This barcode will also be stored and associated with an oocyst within the mosquito considered if it was probabilistically determined to be due to the second flow of importation defined above (B), determined by the ratio of these two flows of infection. Predicted rates of the two flows of infection above are calculated for each year between 2000 and 2015 using a fitted gravity model of human mobility.<sup>14</sup>

## Model Parameter Values

**Table 1:** Parameter estimates used within the model were taken from Griffin et al. 2014,<sup>3</sup> 2015<sup>2</sup> and 2016<sup>1</sup>

| Parameter                                               | Symbol             | Estimate                   |
|---------------------------------------------------------|--------------------|----------------------------|
| Human infection duration (days)                         |                    |                            |
| Latent period                                           | $d_E$              | 12                         |
| Patent infection                                        | $d_A$              | 200                        |
| Clinical disease (treated)                              | $d_T$              | 5                          |
| Clinical disease (untreated)                            | $d_D$              | 5                          |
| Sub-patent infection                                    | $d_U$              | 110                        |
| Prophylaxis following treatment                         | $d_P$              | 25                         |
| Treatment and Importation Parameters                    |                    |                            |
| Probability of seeking treatment if clinically diseased | $f_T$              | Variable                   |
| Importation Rate                                        | $\delta_{imports}$ | 0.01                       |
| Infectiousness to mosquitoes                            |                    |                            |
| Lag from parasites to infectious gametocytes            | $d_g$              | 12 days                    |
| Untreated disease                                       | $c_D$              | 0.0680 day <sup>-1</sup>   |
| Treated disease                                         | $c_T$              | 0.0219 day <sup>-1</sup>   |
| Sub-patent infection                                    | $c_U$              | 0.000620 day <sup>-1</sup> |
| Parameter for infectiousness of state A                 | $\gamma_1$         | 1.824                      |
| Age and heterogeneity                                   |                    |                            |
| Age-dependent biting parameter                          | $\rho$             | 0.85                       |
| Age-dependent biting parameter                          | $\alpha_0$         | 8 years                    |

|                                                                                         |                   |              |
|-----------------------------------------------------------------------------------------|-------------------|--------------|
| Daily mortality rate of humans                                                          | $\mu$             | 0.000180     |
| Variance of the log heterogeneity in biting rates                                       | $\sigma^2$        | 1.67         |
| Immunity reducing probability of infection                                              |                   |              |
| Maximum probability due to no immunity                                                  | $b_0$             | 0.590        |
| Maximum relative reduction due to immunity                                              | $b_1$             | 0.5          |
| Inverse of decay rate                                                                   | $d_B$             | 10 years     |
| Scale parameter                                                                         | $I_{B0}$          | 43.879       |
| Shape parameter                                                                         | $\kappa_B$        | 2.155        |
| Duration in which immunity is not boosted                                               | $u_B$             | 7.199        |
| Immunity reducing probability of clinical disease                                       |                   |              |
| Maximum probability due to no immunity                                                  | $\phi_0$          | 0.791        |
| Maximum relative reduction due to immunity                                              | $\phi_1$          | 0.000737     |
| Inverse of decay rate                                                                   | $d_{CA}$          | 30 years     |
| Scale parameter                                                                         | $I_{C0}$          | 18.0237      |
| Shape parameter                                                                         | $\kappa_C$        | 2.370        |
| Duration in which immunity is not boosted                                               | $u_C$             | 6.0635       |
| New-born immunity relative to mother's                                                  | $P_M$             | 0.774        |
| Inverse of decay rate of maternal immunity                                              | $d_M$             | 67.695       |
| Immunity reducing probability of detection                                              |                   |              |
| Minimum probability due to maximum immunity                                             | $d_1$             | 0.161        |
| Inverse of decay rate                                                                   | $d_{ID}$          | 10 years     |
| Scale parameter                                                                         | $I_{D0}$          | 1.578        |
| Shape parameter                                                                         | $\kappa_D$        | 0.477        |
| Duration in which immunity is not boosted                                               | $u_D$             | 9.445        |
| Scale parameter relating age to immunity                                                | $a_D$             | 21.9 years   |
| Time-scale at which immunity changes with age                                           | $f_{D0}$          | 0.00706      |
| Shape parameter relating age to immunity                                                | $\gamma_D$        | 4.818        |
| Mosquito Population Model                                                               |                   |              |
| Daily mortality of adults                                                               | $\mu_M$           | 0.132        |
| Daily biting rate                                                                       | $\alpha_k$        | 0.333        |
| Anthropophagy                                                                           | $Q_0$             | 0.92         |
| Extrinsic incubation period                                                             | $d_{EM}$          | 10 days      |
| Negative Binomial shape parameter for distribution of oocyst frequencies upon infection | $shape_{oocysts}$ | 2.5          |
| Negative Binomial size parameter for distribution of oocyst frequencies upon infection  | $size_{oocysts}$  | 1            |
| Human Parasite Parameters                                                               |                   |              |
| Geometric distribution of total sporozoites in an infectious bite probability           | $p_{spz}$         | 1/10         |
| Percentage of sporozoites successfully reaching blood-stage                             | $\xi$             | 20% (fitted) |

## References

- 1 Griffin JT, Bhatt S, Sinka ME, *et al.* Potential for reduction of burden and local elimination of malaria by reducing *Plasmodium falciparum* malaria transmission: a mathematical modelling study. *Lancet Infect Dis* 2016; **3099**: 1–8.
- 2 Griffin JT, Hollingsworth TD, Reyburn H, Drakeley CJ, Riley EM, Ghani AC. Gradual acquisition of immunity to severe malaria with increasing exposure. *Proc R Soc B Biol Sci* 2015; **282**: 20142657.
- 3 Griffin JT, Ferguson NM, Ghani AC. Estimates of the changing age-burden of *Plasmodium falciparum* malaria disease in sub-Saharan Africa. *Nat Commun* 2014; **5**. DOI:10.1038/ncomms4136.
- 4 Griffin JT, Hollingsworth TD, Okell LC, *et al.* Reducing *Plasmodium falciparum* Malaria Transmission in Africa: A Model-Based Evaluation of Intervention Strategies. *PLoS Med* 2010; **7**: e1000324.
- 5 Davis CS. The computer generation of multinomial random variates. *Comput Stat Data Anal* 1993; **16**: 205–17.
- 6 Garske T, Ferguson NM, Ghani AC. Estimating Air Temperature and Its Influence on Malaria Transmission across Africa. *PLoS One* 2013; **8**. DOI:10.1371/journal.pone.0056487.
- 7 Daniels R, Volkman SK, Milner DA, *et al.* A general SNP-based molecular barcode for *Plasmodium falciparum* identification and tracking. *Malar J* 2008; **7**: 223.
- 8 Wong W, Griggs AD, Daniels RF, *et al.* Genetic relatedness analysis reveals the cotransmission of genetically related *Plasmodium falciparum* parasites in Thiès, Senegal. *Genome Med* 2017; **9**: 5.
- 9 Stone WJR, Churcher TS, Graumans W, *et al.* A scalable assessment of *Plasmodium falciparum* transmission in the standard membrane-feeding assay, using transgenic parasites expressing green fluorescent protein-luciferase. *J Infect Dis* 2014; **210**: 1456–63.
- 10 Stone WJR, Eldering M, van Gemert G-J, *et al.* The relevance and applicability of oocyst prevalence as a read-out for mosquito feeding assays. *Sci Rep* 2013; **3**: 3418.
- 11 Churcher TS, Blagborough AM, Delves M, *et al.* Measuring the blockade of malaria transmission - An analysis of the Standard Membrane Feeding Assay. *Int J Parasitol* 2012; **42**: 1037–44.
- 12 Churcher TS, Bousema T, Walker M, *et al.* Predicting mosquito infection from *Plasmodium falciparum* gametocyte density and estimating the reservoir of infection. *Elife* 2013; **2013**: 1–12.
- 13 Cook J, Kleinschmidt I, Schwabe C, *et al.* Serological markers suggest heterogeneity of effectiveness of malaria control interventions on Bioko Island, Equatorial Guinea. *PLoS One* 2011; **6**: 1–9.
- 14 Marshall JM, Wu SL, C HMS, *et al.* Mathematical models of human mobility of relevance to malaria transmission in Africa. *Nat Sci Reports* 2018; : 1–27.
